# Supplementary material
Source: publisher figshare collection journal article supplement (https://asha.figshare.com/articles/dataset/_/14802903)

**Supplemental Figure S9.** Network meta-analysis for Patient device preference of each device.

**A**

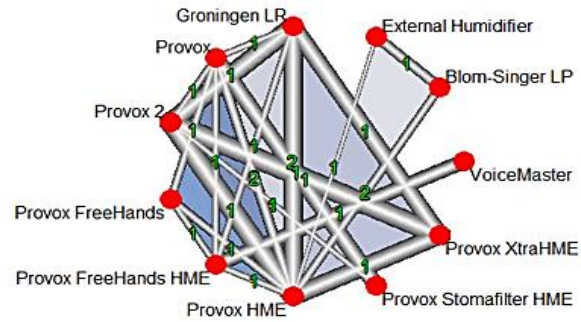

**B**

|                         |                         |                         |                         |                        |                       |                      |                       |                      |                      |                     |  |  |  |  |  |  |  |  |  |  |  |  |
|-------------------------|-------------------------|-------------------------|-------------------------|------------------------|-----------------------|----------------------|-----------------------|----------------------|----------------------|---------------------|--|--|--|--|--|--|--|--|--|--|--|--|
| Provox 2                |                         |                         |                         |                        |                       |                      |                       |                      |                      |                     |  |  |  |  |  |  |  |  |  |  |  |  |
| 2.81 [0.25; 32.21]      | Provox                  |                         |                         |                        |                       |                      |                       |                      |                      |                     |  |  |  |  |  |  |  |  |  |  |  |  |
| 2.59 [0.10; 64.46]      | 0.92 [0.03; 28.03]      | Provox XtraHME          |                         |                        |                       |                      |                       |                      |                      |                     |  |  |  |  |  |  |  |  |  |  |  |  |
| 3.30 [0.24; 46.24]      | 1.17 [0.11; 13.01]      | 1.28 [0.05; 29.78]      | Provox HME              |                        |                       |                      |                       |                      |                      |                     |  |  |  |  |  |  |  |  |  |  |  |  |
| 11.64 [0.59; 229.12]    | 4.14 [0.25; 69.73]      | 4.50 [0.08; 263.30]     | 3.53 [0.11; 108.64]     | Provox Stomafilter HME |                       |                      |                       |                      |                      |                     |  |  |  |  |  |  |  |  |  |  |  |  |
| 23.26 [1.58; 342.99]    | 8.27 [0.67; 102.25]     | 8.99 [0.38; 213.92]     | 7.05 [0.63; 78.24]      | 2.00 [0.06; 65.42]     | Groningen LR          |                      |                       |                      |                      |                     |  |  |  |  |  |  |  |  |  |  |  |  |
| 33.88 [0.65; 1762.24]   | 12.04 [0.27; 538.08]    | 13.09 [0.18; 974.17]    | 10.27 [0.54; 194.25]    | 2.91 [0.03; 266.18]    | 1.46 [0.03; 65.10]    | Blom-Singer LP       |                       |                      |                      |                     |  |  |  |  |  |  |  |  |  |  |  |  |
| 50.59 [1.04; 2469.11]   | 17.98 [0.57; 565.94]    | 19.54 [0.24; 1574.32]   | 15.33 [0.49; 478.88]    | 4.35 [0.06; 328.88]    | 2.17 [0.05; 89.50]    | 1.49 [0.02; 138.01]  | Provox Freehands      |                      |                      |                     |  |  |  |  |  |  |  |  |  |  |  |  |
| 175.42 [6.08; 5058.79]  | 62.36 [3.17; 1227.53]   | 67.78 [1.41; 3251.93]   | 53.16 [2.80; 1008.68]   | 15.07 [0.30; 759.24]   | 7.54 [0.45; 126.33]   | 5.18 [0.08; 331.75]  | 3.47 [0.09; 132.62]   | Provox Freehands HME |                      |                     |  |  |  |  |  |  |  |  |  |  |  |  |
| 330.61 [2.60; 42020.02] | 117.52 [1.20; 11555.34] | 127.73 [0.70; 23413.62] | 100.18 [1.04; 9619.17]  | 28.40 [0.15; 5398.77]  | 14.21 [0.16; 1260.57] | 9.76 [0.04; 2224.98] | 6.54 [0.04; 1014.54]  | 1.88 [0.06; 61.73]   | VoiceMaster          |                     |  |  |  |  |  |  |  |  |  |  |  |  |
| 887.09 [8.07; 97500.00] | 315.32 [3.26; 30522.23] | 342.74 [2.30; 51102.11] | 268.81 [5.51; 13123.21] | 76.21 [0.43; 13583.24] | 38.14 [0.39; 3692.71] | 26.18 [0.82; 837.75] | 17.54 [0.10; 3155.40] | 5.06 [0.04; 663.26]  | 2.68 [0.01; 1078.21] | External Humidifier |  |  |  |  |  |  |  |  |  |  |  |  |

**C**

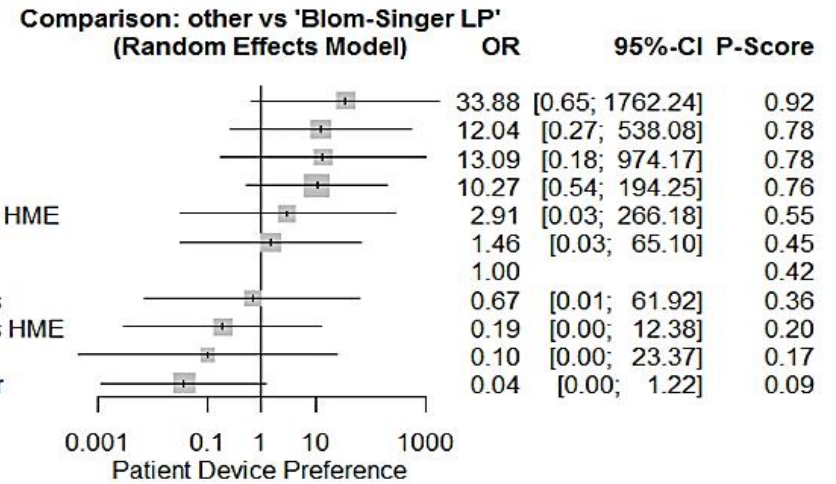

Supplement: Supplementary file 33 [file 1]
