# Supplementary material
Source: publisher figshare collection journal article supplement (https://asha.figshare.com/articles/dataset/_/14802903)

**Supplemental Figure S14.** Network meta-analysis for Sputum production of each device.

**A**

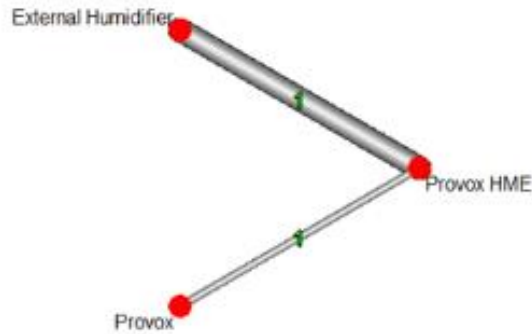

**B**

|                      |                     |                            |
|----------------------|---------------------|----------------------------|
| <b>Provox HME</b>    |                     |                            |
| -2.70 [-6.61; 1.21]  | <b>Provox</b>       |                            |
| -3.00 [-4.55; -1.45] | -0.30 [-4.50; 3.90] | <b>External Humidifier</b> |

**C**

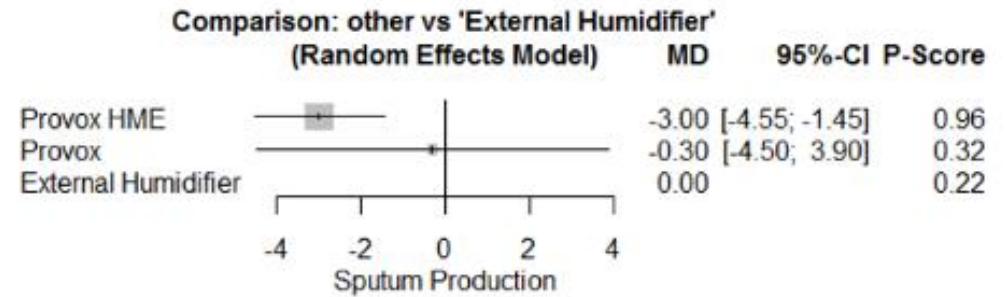

Supplement: Supplementary file 1 [file 1]
