# Supplementary material
Source: publisher figshare collection journal article supplement (https://asha.figshare.com/articles/dataset/_/14802903)

**Supplemental Figure S2.** Risk of bias assessment graph of included randomized controlled trials.

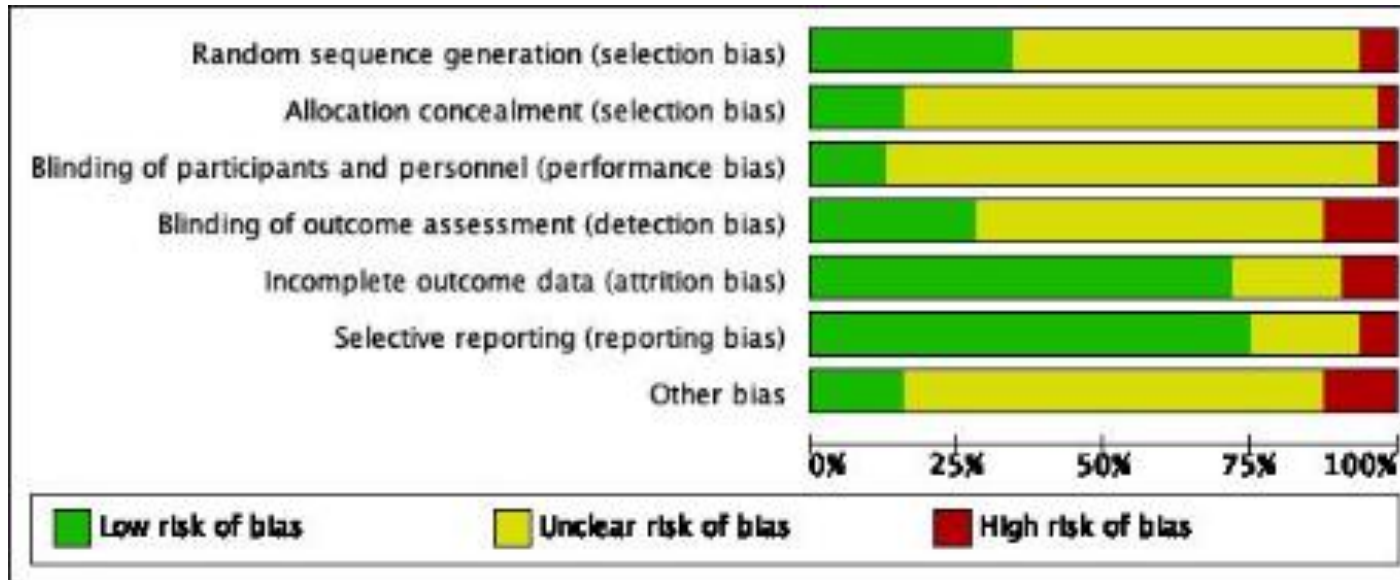

Supplement: Supplementary file 4 [file 1]
