# Supplementary material
Source: publisher figshare collection journal article supplement (https://asha.figshare.com/articles/dataset/_/14802903)

**Supplemental Figure S12.** Network meta-analysis for Coughing Frequency of each device.

**A**

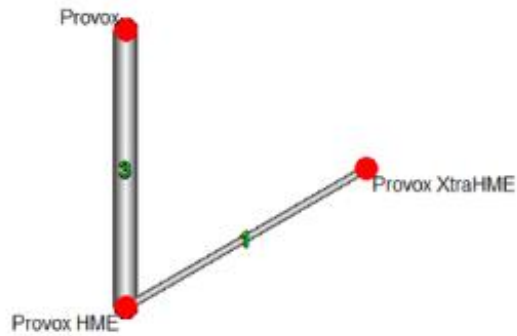

**B**

|                       |                     |               |
|-----------------------|---------------------|---------------|
| <b>Provox XtraHME</b> |                     |               |
| -0.50 [-6.33; 5.33]   | <b>Provox HME</b>   |               |
| -4.13 [-11.15; 2.88]  | -3.63 [-7.53; 0.27] | <b>Provox</b> |

**C**

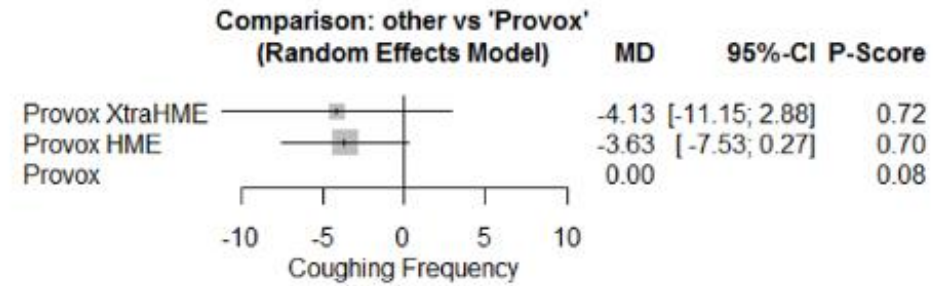

Supplement: Supplementary file 6 [file 1]
