# Supplementary material
Source: publisher figshare collection journal article supplement (https://asha.figshare.com/articles/dataset/_/14802903)
Supplement: Supplementary file 8 [file 1]

**Supplemental Table S3.** Detailed definitions of each outcome in the study.

| <i><b>Outcome</b></i>      | <i><b>Definition</b></i>                                                                                         |
|----------------------------|------------------------------------------------------------------------------------------------------------------|
| Patients’ preferences      | Patients were asked to choose which device they prefer after trying two devices in each study.                   |
| Devices’ lifetime          | How long device still being functionally used without complications.                                             |
| Devices’ replacement       | Device frequency times to be replaced by patients due to complications.                                          |
| Maximum phonation time     | Measurement of respiratory and sound control.                                                                    |
| Leakage                    | Fluids that come out through or around voice prosthesis (VPs).                                                   |
| HME                        | Extra parts for VPs used after TL to help reduce breathing restrictions and compensate nasal functions.          |
| Airflow resistance         | Resistance of the respiratory tract to airflow during inhalation and expiration.                                 |
| Speech rate                | The speed of speaking.                                                                                           |
| Increased phonatory effort | The effort that results in vocal fatigue and decrease in phonatory capabilities.                                 |
| Fundamental frequency      | The lowest frequency of a periodic waveform.                                                                     |
| Voice loudness             | Attribute of auditory sensation in terms of which sounds can be ordered on a scale extending from quiet to loud. |
| Speech intelligibility     | The measure of how comprehensible speech is in given conditions.                                                 |
| Stoma stenosis             | Narrowing or constriction of the stoma or its lumen.                                                             |
| Dislodgement               | To move or go from a dwelling or former position.                                                                |

|                  |                                                                                                             |
|------------------|-------------------------------------------------------------------------------------------------------------|
| Fistula problems | Any complication linked to fistula.                                                                         |
| Granulation      | The process of forming grains or granules from a powdery or solid substance, producing a granular material. |
