# Supplementary material
Source: publisher figshare collection journal article supplement (https://asha.figshare.com/articles/dataset/_/14802903)
Supplement: Supplementary file 11 [file 1]

# **Supplemental Table S4.** All equations used in extraction.

## **Estimation of mean and SD**

When the included study had reported the mean/median, range, and the sample size, the mean and *SD* were estimated by following equations [1]:

|                                                                                                                                |                                   |
|--------------------------------------------------------------------------------------------------------------------------------|-----------------------------------|
| $\text{mean} = \frac{\text{min} + 2\text{median} + \text{max}}{4}$                                                             | when sample size $\leq 25$        |
| $\text{mean} = \text{median}$                                                                                                  | when sample size $> 25$           |
| $SD = \sqrt{\frac{1}{12} \left[ \frac{(\text{min} - 2\text{median} + \text{max})^2}{4} + (\text{max} - \text{min})^2 \right]}$ | when sample size $\leq 15$        |
| $SD = \frac{\text{max} - \text{min}}{4}$                                                                                       | when sample size $> 15 - \leq 70$ |
| $SD = \frac{\text{max} - \text{min}}{6}$                                                                                       | when sample size $> 70$           |

## **Estimation of unreported SD [2]**

When the study reported the mean only, linear ( $\log(SD)$  vs  $\log(\text{mean})$ ) chart was used, in which values were extracted from other included studies.<sup>[1,2]</sup>  
 $\log(\text{unreported SD}) = \text{Log}(\text{reported mean}) * a + b$

## **References**

- [1] Hozo, S. P., Djulbegovic, B., & Hozo, I. (2005). Estimating the mean and variance from the median, range, and the size of a sample. *BMC Med Res Methodol*, 5, 13.
- [2] van Rijkom, H. M., Truin, G. J., & van't Hof, M. A. (1998). A meta-analysis of clinical studies on the caries-inhibiting effect of fluoride gel treatment. *Caries Res*, 32, 83-92.
