# Supplementary material
Source: publisher figshare collection journal article supplement (https://asha.figshare.com/articles/dataset/_/14802903)

**Supplemental Figure S30A.** Meta-analysis for Aspiration pneumonia rate of each device.

**Supplemental Figure S30B.** Meta-analysis for Fungal colonization rate of each device.

### Meta-analysis for aspiration pneumonia among different voice prosthesis in laryngectomized patients

A

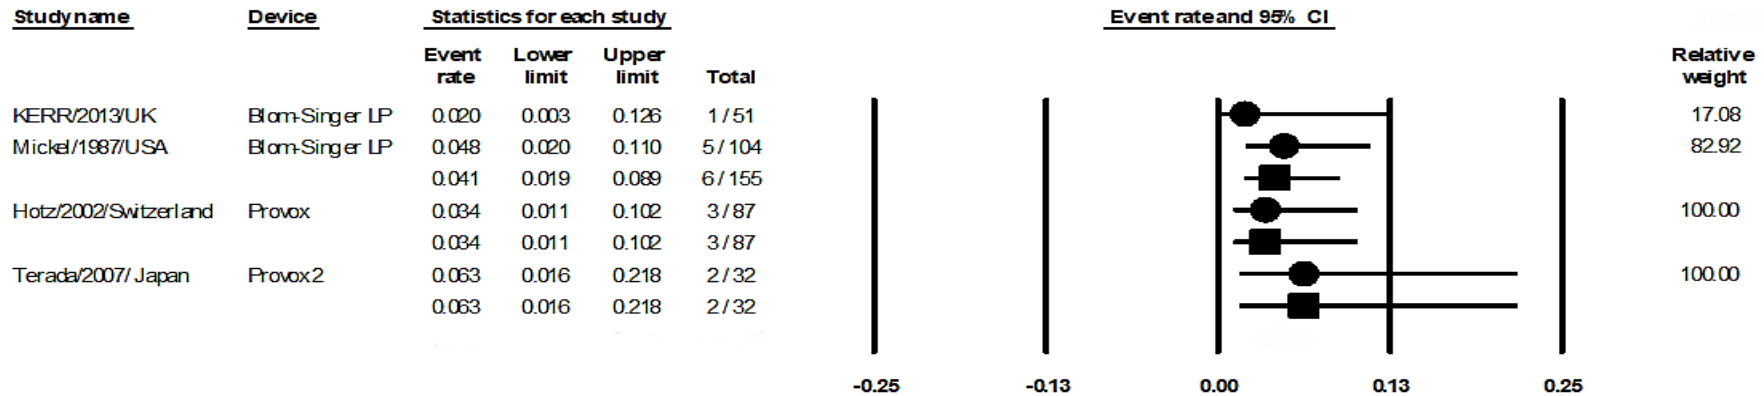

### Meta-analysis for fungal colonization on top of different voice prosthesis in laryngectomized patients

B

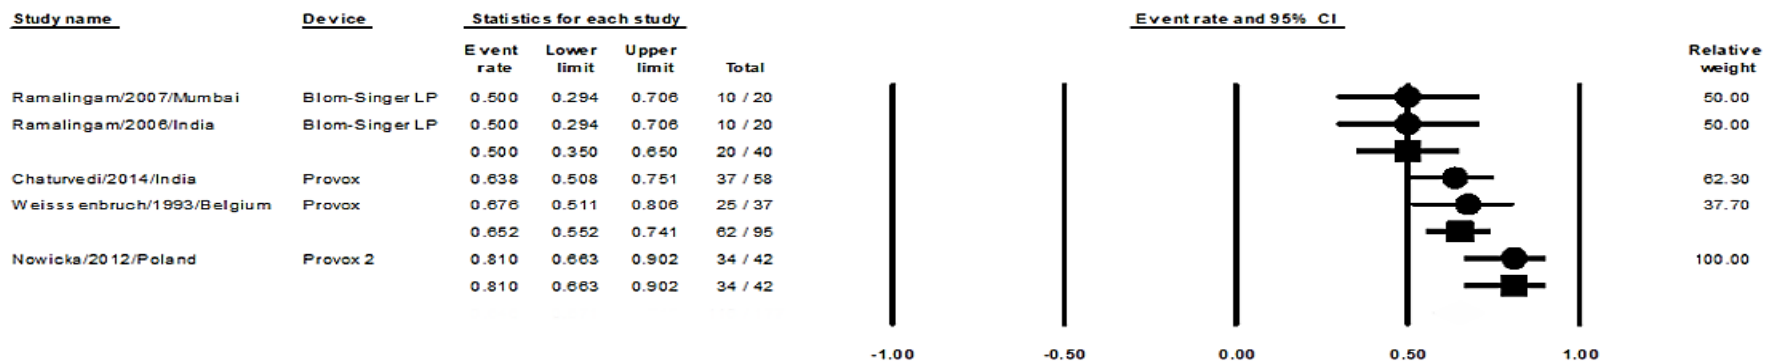

Supplement: Supplementary file 12 [file 1]
