# Supplementary material
Source: publisher figshare collection journal article supplement (https://asha.figshare.com/articles/dataset/_/14802903)
Supplement: Supplementary file 13 [file 1]

**Supplemental Figure S15.** Network meta-analysis for Sleeping problems of each device.

**A**

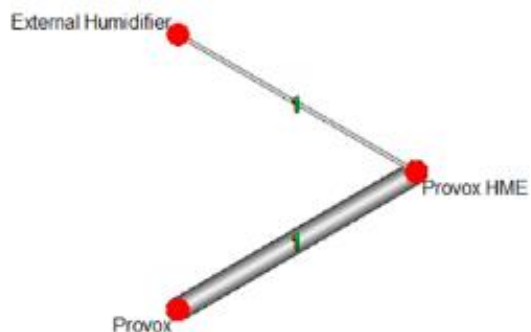

**C**

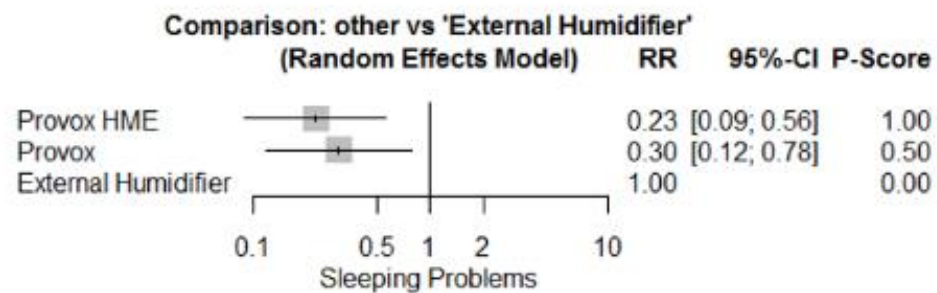

**B**

|                   |                   |                            |
|-------------------|-------------------|----------------------------|
| <b>Provox HME</b> |                   |                            |
| 0.74 [0.60; 0.92] | <b>Provox</b>     |                            |
| 0.23 [0.09; 0.56] | 0.30 [0.12; 0.78] | <b>External Humidifier</b> |
