# Supplementary material
Source: publisher figshare collection journal article supplement (https://asha.figshare.com/articles/dataset/_/14802903)

**Supplemental Figure S31A.** Meta-analysis for Experience with speaking rate of each device.

**Supplemental Figure S31B.** Meta-analysis for Skin irritation rate of each device.

### Meta-analysis for experience with speaking among different voice prosthesis in laryngectomized patients

A

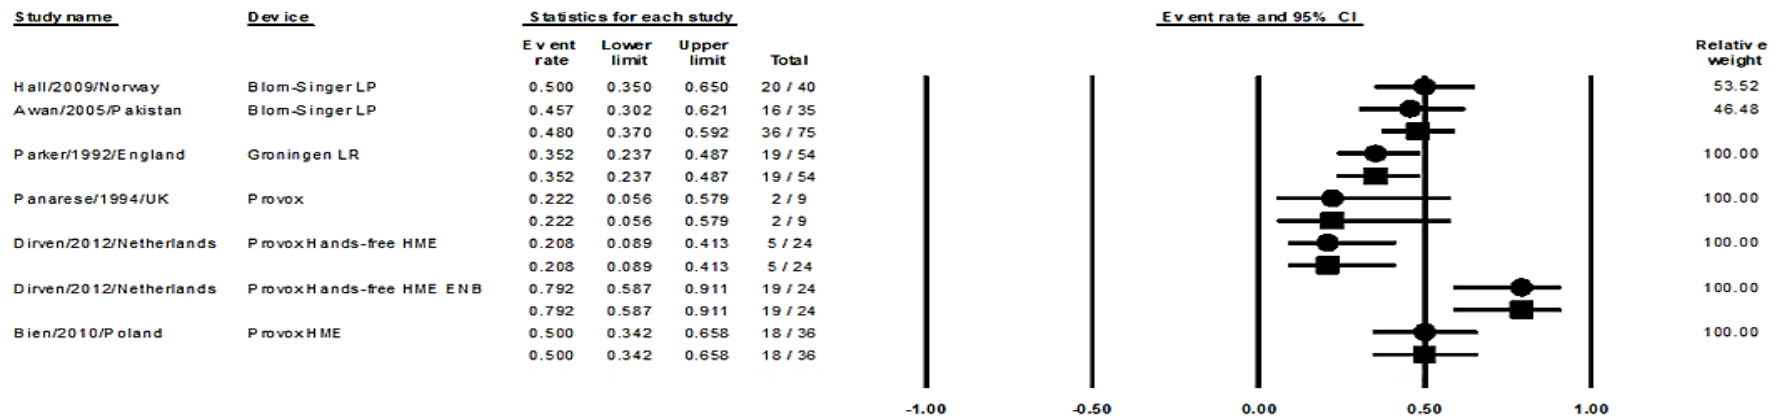

B

### Meta-analysis for skin irritation among different voice prosthesis in laryngectomized patients

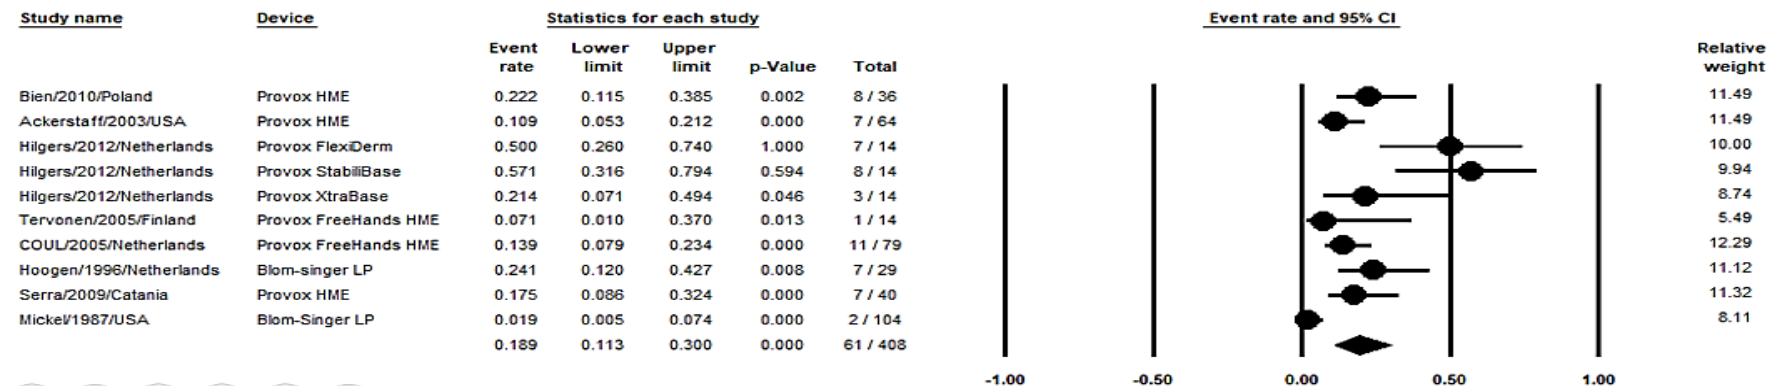

Supplement: Supplementary file 15 [file 1]
