# Supplementary material
Source: publisher figshare collection journal article supplement (https://asha.figshare.com/articles/dataset/_/14802903)
Supplement: Supplementary file 16 [file 1]

**Supplemental Figure S6.** Network meta-analysis for Maximum phonation time of each device.

**A**

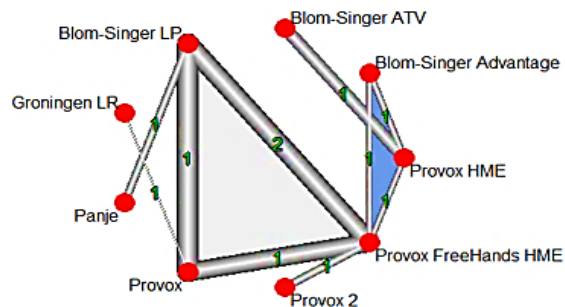

**C**

Comparison: other vs 'Blom-Singer Advantage'  
(Fixed Effect Model)

- Provox HME
- Blom-Singer ATV
- Blom-Singer Advantage
- Provox FreeHands HME
- Provox 2
- Provox
- Blom-Singer LP
- Panje
- Groningen LR

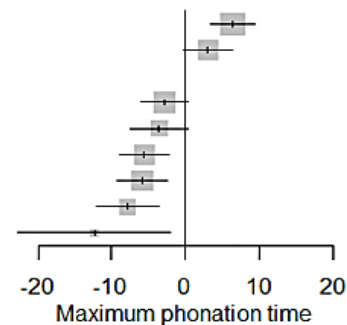

|                       | MD     | 95%-CI          | P-Score |
|-----------------------|--------|-----------------|---------|
| Provox HME            | 6.30   | [ 3.34; 9.26]   | 1.00    |
| Blom-Singer ATV       | 3.00   | [-0.35; 6.35]   | 0.87    |
| Blom-Singer Advantage | 0.00   |                 | 0.74    |
| Provox FreeHands HME  | -2.90  | [-6.07; 0.27]   | 0.59    |
| Provox 2              | -3.60  | [-7.55; 0.35]   | 0.52    |
| Provox                | -5.63  | [-8.99; -2.27]  | 0.33    |
| Blom-Singer LP        | -5.90  | [-9.26; -2.53]  | 0.27    |
| Panje                 | -7.90  | [-12.14; -3.65] | 0.12    |
| Groningen LR          | -12.38 | [-22.69; -2.07] | 0.06    |

**B**

| Provox HME           |                      |                       |                      |                      |                      |                      |                      |              |
|----------------------|----------------------|-----------------------|----------------------|----------------------|----------------------|----------------------|----------------------|--------------|
| 3.30 [ 1.73; 4.87]   | Blom-Singer ATV      |                       |                      |                      |                      |                      |                      |              |
| 6.30 [ 3.34; 9.26]   | 3.00 [ -0.35; 6.35]  | Blom-Singer Advantage |                      |                      |                      |                      |                      |              |
| 9.20 [ 5.88; 12.52]  | 5.90 [ 2.23; 9.57]   | 2.90 [ -0.27; 6.07]   | Provox Freehands HME |                      |                      |                      |                      |              |
| 9.90 [ 5.83; 13.97]  | 6.60 [ 2.23; 10.97]  | 3.60 [ -0.35; 7.55]   | 0.70 [ -1.66; 3.06]  | Provox 2             |                      |                      |                      |              |
| 11.93 [ 8.42; 15.44] | 8.63 [ 4.79; 12.47]  | 5.63 [ 2.27; 8.99]    | 2.73 [ 1.60; 3.86]   | 2.03 [ -0.58; 4.64]  | Provox               |                      |                      |              |
| 12.20 [ 8.69; 15.70] | 8.90 [ 5.05; 12.74]  | 5.90 [ 2.53; 9.26]    | 3.00 [ 1.86; 4.13]   | 2.30 [ -0.32; 4.91]  | 0.27 [ -0.81; 1.35]  | Blom-Singer LP       |                      |              |
| 14.20 [ 9.84; 18.56] | 10.90 [ 6.26; 15.53] | 7.90 [ 3.65; 12.14]   | 5.00 [ 2.17; 7.83]   | 4.30 [ 0.61; 7.98]   | 2.27 [ -0.54; 5.08]  | 2.00 [ -0.59; 4.59]  | Panje                |              |
| 18.68 [ 8.32; 29.04] | 15.38 [ 4.90; 25.86] | 12.38 [ 2.07; 22.69]  | 9.48 [ -0.33; 19.29] | 8.78 [ -1.31; 18.87] | 6.75 [ -3.00; 16.50] | 6.48 [ -3.33; 16.29] | 4.48 [ -5.66; 14.63] | Groningen LR |
