# Supplementary material
Source: publisher figshare collection journal article supplement (https://asha.figshare.com/articles/dataset/_/14802903)

**Supplemental Figure S27.** Network meta-analysis for Prosthesis inaccurate size of each device.

**A**

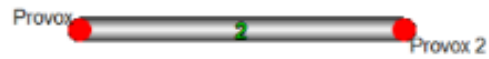

**C**

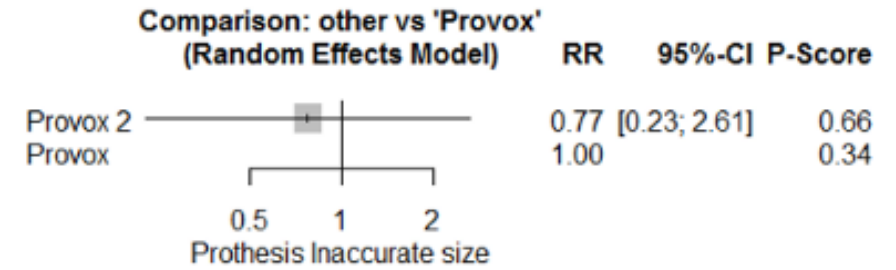

**B**

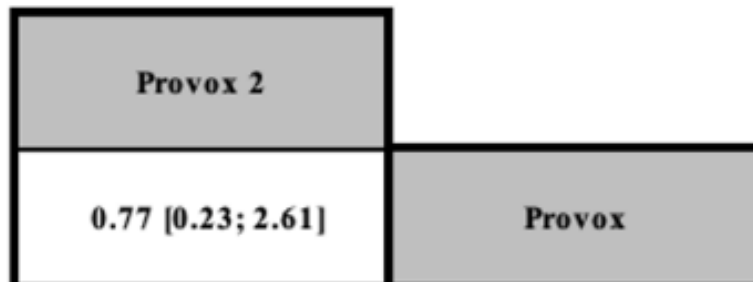

Supplement: Supplementary file 17 [file 1]
