# Supplementary material
Source: publisher figshare collection journal article supplement (https://asha.figshare.com/articles/dataset/_/14802903)

**Supplemental Figure S19.** Network meta-analysis for Fundamental Frequency of each device.

**A**

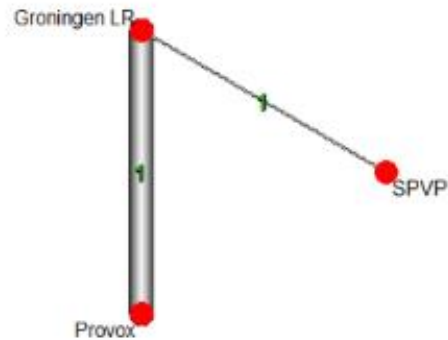

**B**

|                        |                     |                     |
|------------------------|---------------------|---------------------|
| <b>SPVP</b>            |                     |                     |
| 96.25 [ 17.10; 175.41] | <b>Provox</b>       |                     |
| 96.33 [ 17.29; 175.37] | 0.08 [ -4.21; 4.36] | <b>Groningen LR</b> |

**C**

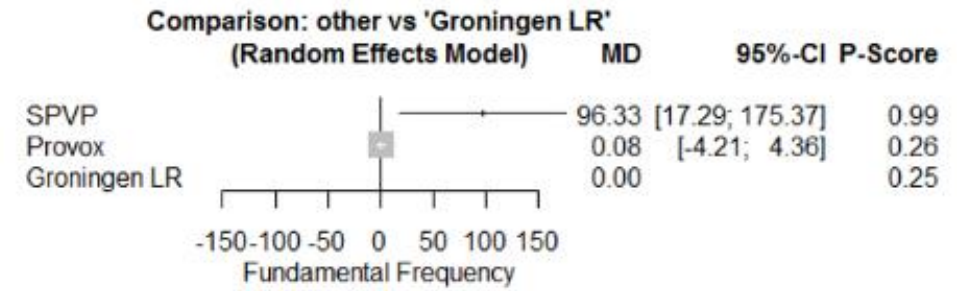

Supplement: Supplementary file 19 [file 1]
