# Supplementary material
Source: publisher figshare collection journal article supplement (https://asha.figshare.com/articles/dataset/_/14802903)

**Supplemental Figure S20.** Network meta-analysis for Voice Loudness of each device.

**A**

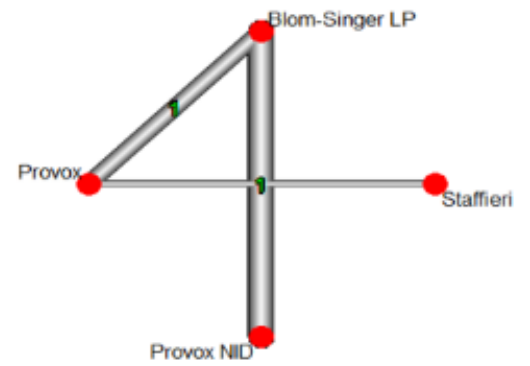

**B**

|                       |                      |                    |                   |
|-----------------------|----------------------|--------------------|-------------------|
| <b>Blom-Singer LP</b> |                      |                    |                   |
| -0.03 [-11.81; 11.75] | <b>Staffieri</b>     |                    |                   |
| 0.50 [-4.48; 5.48]    | 0.53 [-10.15; 11.21] | <b>Provox</b>      |                   |
| 1.00 [-2.62; 4.62]    | 1.03 [-11.30; 13.36] | 0.50 [-5.66; 6.66] | <b>Provox NID</b> |

**C**

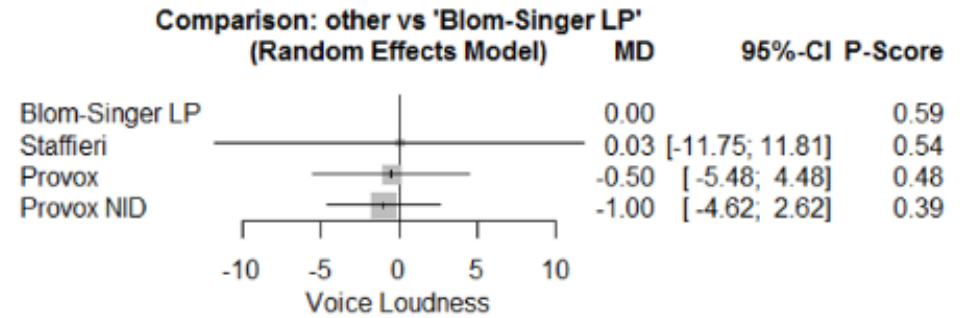

Supplement: Supplementary file 22 [file 1]
