# Supplementary material
Source: publisher figshare collection journal article supplement (https://asha.figshare.com/articles/dataset/_/14802903)
Supplement: Supplementary file 23 [file 1]

Supplemental Figure S1. Risk of bias assessment summary.

| Author/Year        | Random sequence generation (selection bias) | Allocation concealment (selection bias) | Blinding of participants and personnel (performance bias) | Blinding of outcome assessment (detection bias) | Incomplete outcome data (attrition bias) | Selective reporting (reporting bias) | Other bias |
|--------------------|---------------------------------------------|-----------------------------------------|-----------------------------------------------------------|-------------------------------------------------|------------------------------------------|--------------------------------------|------------|
| Ackerstaff/1993    | ?                                           | ?                                       | ?                                                         | ?                                               | +                                        | +                                    | ?          |
| Ameye/2005         | ?                                           | ?                                       | ?                                                         | ?                                               | +                                        | +                                    | ?          |
| Bien/2010          | ?                                           | ?                                       | ?                                                         | +                                               | +                                        | +                                    | ?          |
| Bijl/1992          | +                                           | +                                       | ?                                                         | ?                                               | +                                        | +                                    | ?          |
| Blom/1995          | ?                                           | ?                                       | ?                                                         | +                                               | +                                        | +                                    | ?          |
| Chung/1998         | ?                                           | ?                                       | ?                                                         | ?                                               | +                                        | +                                    | +          |
| Cole/1992          | +                                           | ?                                       | ?                                                         | +                                               | +                                        | +                                    | +          |
| Dassonville/2011   | ?                                           | ?                                       | ?                                                         | +                                               | +                                        | +                                    | ?          |
| DeIsupethe/1998    | ?                                           | ?                                       | ?                                                         | +                                               | ?                                        | +                                    | ?          |
| Dinwen/2012        | +                                           | ?                                       | ?                                                         | ?                                               | +                                        | +                                    | +          |
| Dinwen/2013        | +                                           | +                                       | ?                                                         | ?                                               | +                                        | +                                    | ?          |
| Emmanuel/1999      | ?                                           | ?                                       | ?                                                         | ?                                               | +                                        | ?                                    | +          |
| Hancock/2012       | +                                           | +                                       | +                                                         | +                                               | ?                                        | +                                    | ?          |
| Harms/2011         | ?                                           | ?                                       | ?                                                         | ?                                               | +                                        | +                                    | ?          |
| Herranz/2013       | ?                                           | ?                                       | +                                                         | ?                                               | +                                        | +                                    | ?          |
| Hilgers/2003       | ?                                           | ?                                       | ?                                                         | ?                                               | +                                        | ?                                    | +          |
| Hoogen/1996        | ?                                           | ?                                       | ?                                                         | ?                                               | ?                                        | +                                    | ?          |
| Hoogen/1998        | +                                           | ?                                       | ?                                                         | ?                                               | +                                        | +                                    | ?          |
| Kalkeren/2013      | +                                           | ?                                       | ?                                                         | ?                                               | +                                        | +                                    | ?          |
| Lth-Bijl/1992      | ?                                           | ?                                       | ?                                                         | ?                                               | +                                        | +                                    | ?          |
| Lorenz/2007        | ?                                           | ?                                       | ?                                                         | ?                                               | +                                        | ?                                    | +          |
| Merol/2011         | +                                           | ?                                       | ?                                                         | ?                                               | +                                        | +                                    | +          |
| Scheenstra/2011    | ?                                           | ?                                       | ?                                                         | ?                                               | +                                        | +                                    | +          |
| Shekaralah/2018    | ?                                           | +                                       | ?                                                         | +                                               | +                                        | ?                                    | ?          |
| Stuart/1983        | ?                                           | ?                                       | ?                                                         | ?                                               | +                                        | +                                    | ?          |
| Tack/2008          | ?                                           | ?                                       | ?                                                         | +                                               | +                                        | ?                                    | +          |
| Torn/2001          | +                                           | ?                                       | ?                                                         | ?                                               | +                                        | +                                    | ?          |
| Torn/2006          | +                                           | +                                       | +                                                         | +                                               | ?                                        | ?                                    | ?          |
| Ward/2011          | +                                           | +                                       | +                                                         | +                                               | ?                                        | +                                    | ?          |
| Welschenbruch/1997 | ?                                           | ?                                       | +                                                         | +                                               | +                                        | +                                    | ?          |
| Zuur/2008          | +                                           | ?                                       | ?                                                         | +                                               | +                                        | +                                    | ?          |
| Zuur/2009          | +                                           | ?                                       | ?                                                         | +                                               | +                                        | +                                    | ?          |
