# Supplementary material
Source: publisher figshare collection journal article supplement (https://asha.figshare.com/articles/dataset/_/14802903)
Supplement: Supplementary file 24 [file 1]

**Supplemental Figure S7.** Network meta-analysis for Leakage rate of each device.

**A**

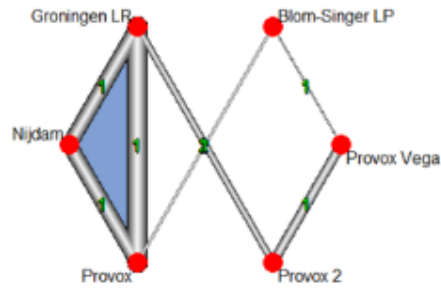

**C**

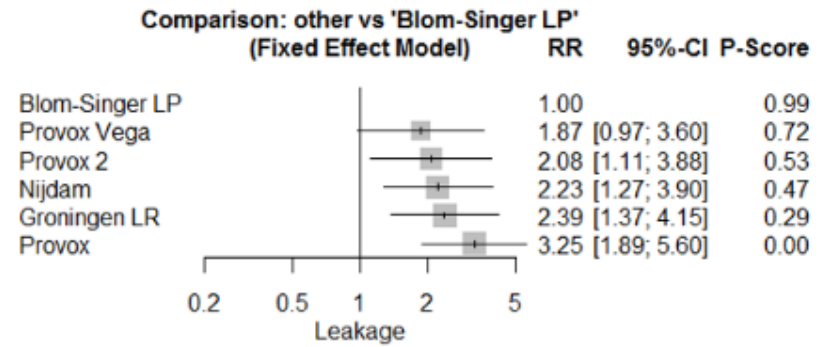

**B**

| Blom-Singer LP    |                   |                   |                   |                   |        |
|-------------------|-------------------|-------------------|-------------------|-------------------|--------|
|                   | Provox Vega       |                   |                   |                   |        |
| 0.54 [0.28; 1.03] |                   | Provox 2          |                   |                   |        |
| 0.48 [0.26; 0.90] | 0.90 [0.73; 1.10] |                   | Nijdam            |                   |        |
| 0.45 [0.26; 0.79] | 0.84 [0.57; 1.24] | 0.93 [0.67; 1.30] |                   | Groningen LR      |        |
| 0.42 [0.24; 0.73] | 0.78 [0.54; 1.13] | 0.87 [0.64; 1.18] | 0.93 [0.81; 1.08] |                   | Provox |
| 0.31 [0.18; 0.53] | 0.57 [0.39; 0.84] | 0.64 [0.46; 0.88] | 0.68 [0.59; 0.79] | 0.73 [0.66; 0.82] |        |
