# Supplementary material
Source: publisher figshare collection journal article supplement (https://asha.figshare.com/articles/dataset/_/14802903)
Supplement: Supplementary file 25 [file 1]

**Supplemental Figure S18.** Network meta-analysis for Voice speech quality of each device.

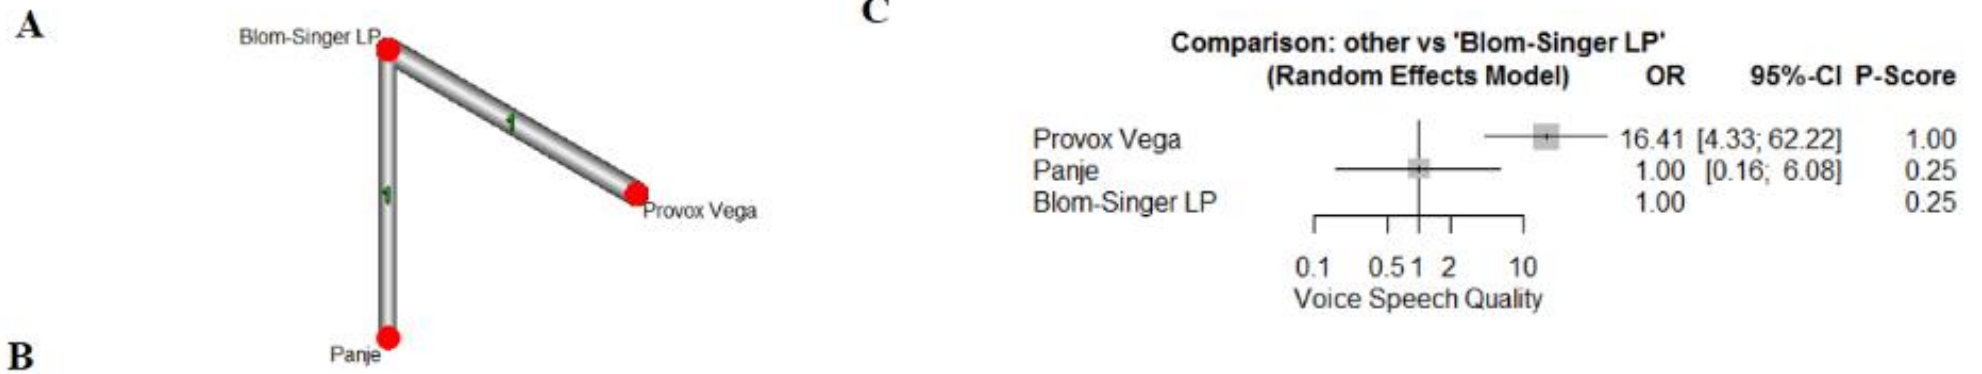

|                      |                   |                       |
|----------------------|-------------------|-----------------------|
| <b>Provox Vega</b>   |                   |                       |
| 16.41 [1.74; 154.76] | <b>Panje</b>      |                       |
| 16.41 [4.33; 62.22]  | 1.00 [0.16; 6.08] | <b>Blom-Singer LP</b> |
