# Supplementary material
Source: publisher figshare collection journal article supplement (https://asha.figshare.com/articles/dataset/_/14802903)
Supplement: Supplementary file 26 [file 1]

**Supplemental Figure S11.** Network meta-analysis for Breathing problems of each device.

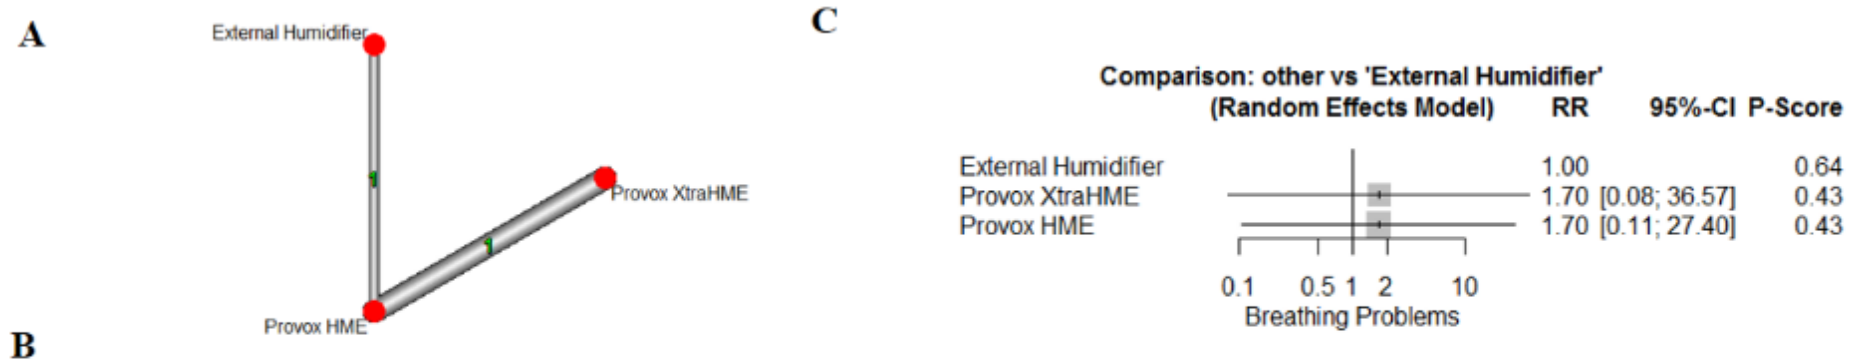

|                            |                          |                   |
|----------------------------|--------------------------|-------------------|
| <b>External Humidifier</b> |                          |                   |
| <b>0.59 [0.03; 12.61]</b>  | <b>Provox XtraHME</b>    |                   |
| <b>0.59 [0.04; 9.45]</b>   | <b>1.00 [0.27; 3.67]</b> | <b>Provox HME</b> |
