# Supplementary material
Source: publisher figshare collection journal article supplement (https://asha.figshare.com/articles/dataset/_/14802903)
Supplement: Supplementary file 28 [file 1]

**Supplemental Figure S13.** Network meta-analysis for Forced expectations of each device.

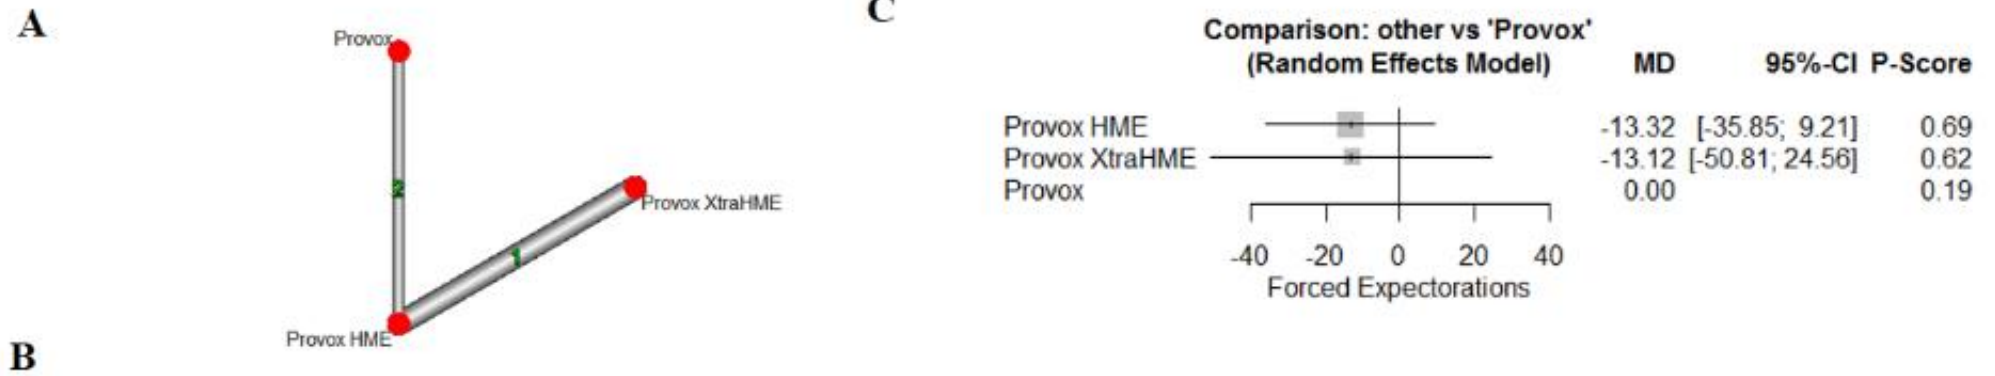

|                              |                               |               |
|------------------------------|-------------------------------|---------------|
| <b>Provox HME</b>            |                               |               |
| <b>-0.20 [-30.41; 30.01]</b> | <b>Provox XtraHME</b>         |               |
| <b>-13.32 [-35.85; 9.21]</b> | <b>-13.12 [-50.81; 24.56]</b> | <b>Provox</b> |
