# Supplementary material
Source: publisher figshare collection journal article supplement (https://asha.figshare.com/articles/dataset/_/14802903)
Supplement: Supplementary file 29 [file 1]

**Supplemental Table S2.** Detailed search strategy for each database search.

| No. | Databases<br>(Total 15) | Search Terms                                                                                                                                                                                                                                                                                                                                                                                                                                                                                                                                                                                                                                                                                                                                     | Results<br>8,251 |
|-----|-------------------------|--------------------------------------------------------------------------------------------------------------------------------------------------------------------------------------------------------------------------------------------------------------------------------------------------------------------------------------------------------------------------------------------------------------------------------------------------------------------------------------------------------------------------------------------------------------------------------------------------------------------------------------------------------------------------------------------------------------------------------------------------|------------------|
| 1   | PubMed                  | ((Blom-Singer) OR Provox OR Xtrabase OR Adeva OR Eska-Hermann OR MediTop OR Heimomed OR ActiValve OR Groningen OR Nijdam OR device OR valve OR prosthesis OR prostheses) AND (laryngectomy OR laryngectomized OR tracheoesophageal) AND (randomized OR randomised OR random OR randomly OR randomization OR randomisation OR RCT OR RCTs OR "clinical trial"[Publication Type] OR "clinical trials as topic"[MeSH Terms] OR "clinical trial")                                                                                                                                                                                                                                                                                                    | 152              |
| 2   | Scopus                  | ((Blom-Singer) OR Provox OR Xtrabase OR Adeva OR Eska-Hermann OR MediTop OR Heimomed OR ActiValve OR Groningen OR Nijdam OR device OR valve) AND (laryngectomy OR laryngectomized OR tracheoesophageal) AND (randomized OR randomised OR random OR randomly OR randomization OR randomisation OR RCT OR RCTs OR "clinical trial")                                                                                                                                                                                                                                                                                                                                                                                                                | 121              |
| 3   | ISI (WOS)               | ((Blom-Singer) OR Provox OR Xtrabase OR Adeva OR Eska-Hermann OR MediTop OR Heimomed OR ActiValve OR Groningen OR Nijdam OR device OR valve OR prosthesis OR prostheses) AND (laryngectomy OR laryngectomized OR tracheoesophageal) AND (randomized OR randomised OR random OR randomly OR randomization OR randomisation OR RCT OR RCTs OR "clinical trial")                                                                                                                                                                                                                                                                                                                                                                                    | 50               |
| 4   | Google Scholar          | <p><b>Search 1</b></p> <p>* With all of the words: laryngectomy</p> <p>* With at least one: Blom-Singer Provox Xtrabase Adeva Eska-Hermann MediTop Heimomed ActiValve Groningen Nijdam device valve prostheses prosthesis ==&gt; 168</p> <p><b>Search 2</b></p> <p>* With all of the words: laryngectomized</p> <p>* With at least one of the words: "Blom Singer" Provox Xtrabase Adeva Eska-Hermann MediTop Heimomed ActiValve Groningen Nijdam device valve prostheses prosthesis ==&gt; 37</p> <p><b>Search 3</b></p> <p>* With all of the words: tracheoesophageal</p> <p>* With at least one: Blom-Singer Provox Xtrabase Adeva Eska-Hermann MediTop Heimomed ActiValve Groningen Nijdam device valve prostheses prosthesis ==&gt; 141</p> | 364              |

|           |                                                 |                                                                                                                                                                                                                                                                                                                                                                                             |            |
|-----------|-------------------------------------------------|---------------------------------------------------------------------------------------------------------------------------------------------------------------------------------------------------------------------------------------------------------------------------------------------------------------------------------------------------------------------------------------------|------------|
| <b>5</b>  | <b>EMBASE</b>                                   | ((Blom-Singer) OR Provox OR Xtrabase OR Adeva OR Eska-Hermann OR MediTop OR Heimomed OR ActiValve OR Groningen OR Nijdam OR device OR valve OR prosthesis OR prostheses) AND (laryngectomy OR laryngectomized OR tracheoesophageal) AND (randomized OR randomised OR random OR randomly OR randomization OR randomisation OR RCT OR RCTs OR "clinical trial")                               | <b>163</b> |
| <b>6</b>  | <b>WHO Global Health Library (GHL)</b>          | ((Blom-Singer) OR Provox OR Xtrabase OR Adeva OR Eska-Hermann OR MediTop OR Heimomed OR ActiValve OR Groningen OR Nijdam OR device OR valve OR prosthesis OR prostheses) AND (laryngectomy OR laryngectomized OR tracheoesophageal) AND (randomized OR randomised OR random OR randomly OR randomization OR randomisation OR RCT OR RCTs OR "clinical trial")                               | <b>161</b> |
| <b>7</b>  | <b>Virtual Health Library (VHL)</b>             | ((Blom-Singer) OR Provox OR Xtrabase OR Adeva OR Eska-Hermann OR MediTop OR Heimomed OR ActiValve OR Groningen OR Nijdam OR device OR valve OR prosthesis OR prostheses) AND (laryngectomy OR laryngectomized OR tracheoesophageal) AND (randomized OR randomised OR random OR randomly OR randomization OR randomisation OR RCT OR RCTs OR "clinical trial")                               | <b>161</b> |
| <b>8</b>  | <b>Clinical trial .gov</b>                      | ((Blom-Singer) OR Provox OR Xtrabase OR Adeva OR Eska-Hermann OR MediTop OR Heimomed OR ActiValve OR Nijdam OR device OR valve OR prosthesis OR prostheses) AND (laryngectomy OR laryngectomized OR tracheoesophageal)                                                                                                                                                                      | <b>14</b>  |
| <b>9</b>  | <b>Cochrane</b>                                 | ((Blom-Singer) OR Provox OR Xtrabase OR Adeva OR Eska-Hermann OR MediTop OR Heimomed OR ActiValve OR Groningen OR Nijdam OR device OR valve OR prosthesis OR prostheses) AND (laryngectomy OR laryngectomized OR tracheoesophageal) AND (randomized OR randomised OR random OR randomly OR randomization OR randomisation OR RCT OR RCTs OR "clinical trial")                               | <b>43</b>  |
| <b>10</b> | <b>metaRegister of Controlled Trials (mRCT)</b> | ((Blom-Singer) OR Provox OR Xtrabase OR Adeva OR Eska-Hermann OR MediTop OR Heimomed OR ActiValve OR Groningen OR Nijdam OR device OR valve OR prosthesis OR prostheses) AND (laryngectomy OR laryngectomized OR tracheoesophageal) AND (randomized OR randomised OR random OR randomly OR randomization OR randomisation OR RCT OR RCTs OR "clinical trial")                               | <b>2</b>   |
| <b>11</b> | <b>Science Direct</b>                           | TITLE-ABSTR-KEY((Blom-Singer) OR Provox OR Xtrabase OR Adeva OR Eska-Hermann OR MediTop OR Heimomed OR ActiValve OR Groningen OR Nijdam OR device OR valve OR prosthesis OR prostheses) AND TITLE-ABSTR-KEY(laryngectomy OR laryngectomized OR tracheoesophageal) AND (randomized OR randomised OR random OR randomly OR randomization OR randomisation OR RCT OR RCTs OR "clinical trial") | <b>137</b> |
| <b>12</b> | <b>SIGLE</b>                                    | ((Blom-Singer) OR Provox OR Xtrabase OR Adeva OR Eska-Hermann OR MediTop OR Heimomed OR ActiValve OR Groningen OR Nijdam OR device OR valve OR prosthesis OR prostheses) AND (laryngectomy OR laryngectomized OR tracheoesophageal) AND (randomized OR randomised OR random OR randomly OR randomization OR randomisation OR RCT OR RCTs OR "clinical trial")                               | <b>0</b>   |

|           |                                                                   |                                                                                                                                                                                                                                                                                                                                                               |              |
|-----------|-------------------------------------------------------------------|---------------------------------------------------------------------------------------------------------------------------------------------------------------------------------------------------------------------------------------------------------------------------------------------------------------------------------------------------------------|--------------|
| <b>13</b> | <b>POPLINE</b>                                                    | ((Blom-Singer) OR Provox OR Xtrabase OR Adeva OR Eska-Hermann OR MediTop OR Heimomed OR ActiValve OR Groningen OR Nijdam OR device OR valve OR prosthesis OR prostheses) AND (laryngectomy OR laryngectomized OR tracheoesophageal) AND (randomized OR randomised OR random OR randomly OR randomization OR randomisation OR RCT OR RCTs OR "clinical trial") | <b>0</b>     |
| <b>14</b> | <b>WHO</b>                                                        | ((Blom-Singer) OR Provox OR Xtrabase OR Adeva OR Eska-Hermann OR MediTop OR Heimomed OR ActiValve OR Groningen OR Nijdam OR device OR valve OR prosthesis OR prostheses) AND (laryngectomy OR laryngectomized OR tracheoesophageal) AND (randomized OR randomised OR random OR randomly OR randomization OR randomisation OR RCT OR RCTs OR "clinical trial") | <b>1</b>     |
| <b>15</b> | <b>CINAHL</b>                                                     | ((Blom-Singer) OR Provox OR Xtrabase OR Adeva OR Eska-Hermann OR MediTop OR Heimomed OR ActiValve OR Groningen OR Nijdam OR device OR valve OR prosthesis OR prostheses) AND (laryngectomy OR laryngectomized OR tracheoesophageal) AND (randomized OR randomised OR random OR randomly OR randomization OR randomisation OR RCT OR RCTs OR "clinical trial") | <b>56</b>    |
|           | <b>New search term for inclusion of all study design articles</b> | ((voice AND (prosthesis OR prostheses)) OR device OR valve OR prosthesis OR prostheses) AND (laryngectomy OR laryngectomized OR tracheoesophageal)                                                                                                                                                                                                            | <b>6,826</b> |
