# Supplementary material
Source: publisher figshare collection journal article supplement (https://asha.figshare.com/articles/dataset/_/14802903)
Supplement: Supplementary file 32 [file 1]

**Supplemental Table S5.** Baseline characteristics of the patients in the included studies.

| Reference ID              | Sample<br><i>N</i> = 11918 | Age (Years)<br>Mean ( <i>SD</i> ) | Gender<br>Male (%)               | Voice prostheses group types ( <i>n</i> )                             | Radiotherapy<br><i>N</i> (%) | Follow-up<br>(Months) | Quality<br>assessment |
|---------------------------|----------------------------|-----------------------------------|----------------------------------|-----------------------------------------------------------------------|------------------------------|-----------------------|-----------------------|
| Bertl/2015/Austria        | 15                         | 64.1 (7.4)                        | 11 (73.3)                        | PRO 2 (15)                                                            | NR                           | NR                    | Fair                  |
| Bertl/2012/Austria        | 15                         | 65 (9.4)                          | 14 (93.3)                        | PRO 2 (15)                                                            | 13 (86.6)                    | NR                    | Poor                  |
| Leonhard/2010/Austria     | 10                         | 63.2 (3.7)                        | 4 (80)                           | PRO 2 (5) / Phonox (5)                                                | 5 (100)                      | NR                    | Poor                  |
| Dirven/2013/Australia     | 20                         | 69.3 (6.8)                        | 19 (95)                          | PRO Hands-free with ENB 2 (10) /<br>PRO Hands-free without ENB 2 (10) | 19 (95)                      | 0.5 & 1               | *(Low risk)           |
| Hancock/2012/Australia    | 31                         | 64.3 (13.8)                       | 25 (81)                          | PRO Vega (15) / BS (16)                                               | 30 (97)                      | 0.75 & 1.5            | *(Low risk)           |
| Ward/2011/Australia       | 31                         | 64.3 (13.8)                       | 25 (81)                          | PRO Vega (15) / BS (16)                                               | 30 (97)                      | 0.75 & 1.5            | *(Low risk)           |
| HANCOCK/2005/Australia    | 15                         | 65                                | 13 (86.6)                        | PRO NID (15) / BS (15)                                                | 13 (86.7)                    | 6                     | Fair                  |
| Hancock/2005/Australia    | 15                         | NR                                | 13 (86.6)                        | BS (15) / PRO NID (15)                                                | 13 (86.6)                    | NR                    | Fair                  |
| Pighi/1997/Australia      | 469                        | ^(28-86)                          | NR                               | BS (469)                                                              | 469 (100)                    | 6                     | Poor                  |
| Bridger/1995/Australia    | 137                        | ^(17-90)                          | 121 (88.3)                       | BS (137)                                                              | 85 (62)                      | ^(0-36)               | Fair                  |
| Mendelsohn/1993/Australia | 39                         | BS 62.5 /<br>Control 67           | BS 25 (86.2) /<br>Control 8 (80) | BS (29) / Control (10)                                                | 27 (93.1)                    | NR                    | Poor                  |
| Cole/1992/Australia       | 50                         | 66 ^ (44-82)                      | 41 (82)                          | BS (50)                                                               | 26 (52)                      | NR                    | *(Low risk)           |
| Ameye/2005/Belgium        | 19                         | ^(42–79)                          | 18 (95)                          | PRO with nystatin (14) / PRO without nystatin<br>(5)                  | NR                           | NR                    | *(Unclear risk)       |
| Lequeu/2003/Belgium       | 38                         | NR                                | 36 (94.7)                        | PRO (24) / PRO 2 (128)                                                | 14 (9.2)                     | NR                    | Good                  |
| Delsupehe/1998/Belgium    | 113                        | 62.7                              | 50 (87.6)                        | PRO (63) / BS (50)                                                    | NR                           | 1 & 4                 | *(Unclear risk)       |

|                              |     |              |            |                                                    |           |             |             |
|------------------------------|-----|--------------|------------|----------------------------------------------------|-----------|-------------|-------------|
| Weissenbruch/1997/Belgium    | 36  | 63.1 (11.5)  | 34 (94.4)  | PRO with nystatin (18) / PRO without nystatin (18) | 36 (100)  | 1,2,3,4,5,6 | *(Low risk) |
| Kesteloot/1994/Belgium       | 43  | 62 (9.3)     | 41 (95.3)  | PRO (31)                                           | NR        | 8           | Fair        |
| Weissenbruch/1993/Belgium    | 37  | 61           | 33 (89.18) | PRO (37)                                           | NR        | NR          | Good        |
| Monaretti/2016/Brazil        | 34  | NR           | NR         | PRO (34)                                           | 21 (61.7) | NR          | Good        |
| Reis/2013/Brazil             | 30  | 61           | 22 (73.3)  | PRO 2 (30)                                         | 30 (100)  | NR          | Poor        |
| Takeshita/2010/Brazil        | 12  | 64 (8.4)     | 9 (75)     | PRO (12)                                           | 10 (83.3) | NR          | Fair        |
| Chone/2005/Brazil            | 71  | NR           | NR         | BS (71)                                            | NR        | ^(12-87)    | Poor        |
| Kruschewsky/2002/Brazil      | 10  | 63.5         | 10 (100)   | BS (6) / PRO (4)                                   | NR        | NR          | Poor        |
| Foreman/2016/Canada          | 48  | 63.4 (11.2)  | NR         | HME (16) / External Humidifier (32)                | NR        | NR          | Fair        |
| Cornu/2003/China             | 128 | NR           | 113 (88.2) | PRO (128)                                          | NR        | NR          | Fair        |
| Wong/1997/China              | 159 | 61           | 145 (91.6) | BS (159)                                           | NR        | ^(3-110)    | Poor        |
| Wong/1997/China              | 159 | 61 ^ (27-83) | NR         | BS (159)                                           | NR        | NR          | Good        |
| Lukinovic/2012/Croatia       | 100 | 64 ^ (47-86) | 88 (96.7)  | PRO (100) / BS (100)                               | 73 (80.2) | NR          | Fair        |
| Pedusic/2012/Croatia         | 91  | NR           | NR         | PRO 2 (91)                                         | NR        | NR          | Good        |
| TiTac/2010/Croatia           | 94  | 59.9 (8.7)   | 85 (90.4)  | PRO 2 (94)                                         | 88 (93.6) | NR          | Fair        |
| Globlek/2004/Croatia         | 10  | 57.5         | 10 (100)   | PRO 2 (5)                                          | NR        | NR          | Poor        |
| Slaviček/1997/Czech Republic | 54  | NR           | 51 (94.4)  | PRO (39) / LLAP (8) / BS (5)                       | 25 (46.2) | NR          | Poor        |
| BALLE/2000/Denmark           | 76  | 62 ^ (42-84) | 58         | PRO (61) BS (15)                                   | NR        | NR          | Fair        |
| Sayed/2012/UK                | 18  | 56.9         | 14 (77.78) | BS (22)                                            | 13 (72.2) | 12          | Fair        |
| Samir/2003/Egypt             | 7   | 62.4         | 7 (100)    | Simple cheap prosthesis (7)                        | NR        | NR          | Air         |

|                         |     |                 |            |                                                                 |           |                |                 |
|-------------------------|-----|-----------------|------------|-----------------------------------------------------------------|-----------|----------------|-----------------|
| Tantawy/2003/Egypt      | 100 | 54.3            | 92 (92)    | PRO (100)                                                       | NR        | NR             | Fair            |
| Tervonen/2005/Finland   | 14  | 60 ^{(40-85)}   | 14 (100)   | PRO HME & PRO Free-Hands HME (14)                               | 14 (100)  | NR             | Good            |
| MAKITIE/2003/Finland    | 95  | 63.5            | 88 (92.6)  | PRO (95)                                                        | 88 (92.6) | NR             | Fair            |
| Dassonville/2011/France | 60  | 62.5 (11)       | 58 (96.7)  | PRO HME (30) / PRO without HME (30)                             | 41 (68.3) | 0, 3, 6        | *(Unclear risk) |
| Merol/2011/France       | 53  | 60 (10.3)       | 44 (83)    | PRO HME (27) / External Humidifier (26)                         | 38 (71.7) | 0.5            | *(Unclear risk) |
| Traissac/2007/France    | 225 | 59              | 214 (95.1) | NEWVOX (225)                                                    | NR        | NR             | Good            |
| Laccourreye/1997/France | 37  | 59              | 35 (94.5)  | PRO (37)                                                        | 16 (43.2) | 18             | Fair            |
| Doescher/2015/Germany   | 21  | 68.5 ^{(53-81)} | 19 (90.4)  | Silicone stoma prosthesis (21)                                  | NR        | NR             | Fair            |
| Müller/2015/Germany     | 41  | 56.2 (12.3)     | 30 (73.1)  | Laryvox (41)                                                    | NR        | NR             | Fair            |
| Kress/2014/Germany      | 749 | 62.8 ^{(42-86)} | 91 (89.2)  | PRO 2 (424) / PRO Vega (117) /<br>PRO ActiValve (38) / BS (170) | 91 (89.2) | NR             | Poor            |
| Schuldt/2011/Germany    | 67  | NR              | 63 (94)    | ESKA-Herrmann (201)                                             | NR        | NR             | Fair            |
| Lawrence/2010/Germany   | 28  | 63.1            | 18 (94.7)  | PRO 2 (19) / PRO Vega (28)                                      | NR        | 2-6            | Good            |
| Minovi/2009/Germany     | 35  | ^^58.8          | 24 (80)    | BS (16)                                                         | NR        | 53 ^{(12-110)} | Fair            |
| KRAMP/2009/Germany      | 30  | ^^59.23         | 27 (90)    | HME (8)                                                         | NR        | NR             | Fair            |
| Lawrence/2009/Germany   | 17  | 53.6 ^{(41-76)} | 15 (88.2)  | PRO Freehand HME (17)                                           | 17        | ^{(24-107)}    | Fair            |
| Lorenz/2007/Germany     | 24  | 57.7            | 21 (87.5)  | PRO Hands-free HME (24)                                         | 18 (75)   | 1 & 6          | *(Unclear risk) |
| Kress/2006/Germany      | 33  | 65.4            | 30 (90.9)  | BS (33)                                                         | NR        | NR             | Poor            |
| M.Tisch/2003/Germany    | 52  | 59.67 (9.19)    | 49 (94.2)  | PRO (52)                                                        | 28 (53.8) | NR             | Fair            |
| Schuster/2003/Germany   | 25  | 62.1 (7.5)      | 25 (100)   | PRO (25)                                                        | NR        | NR             | Fair            |

|                               |     |              |            |                                             |           |         |                 |
|-------------------------------|-----|--------------|------------|---------------------------------------------|-----------|---------|-----------------|
| Schuster/2003/Germany         | 25  | 62.3 (8)     | 25 (100)   | PRO (25)                                    | NR        | NR      | Fair            |
| Schäfer/2001/Germany          | 58  | NR           | 53 (91.37) | BS (172) / PRO (136) / PRO 2 (75)           | 45 (77.5) | NR      | Fair            |
| Issing/2000/Germany           | 103 | 57           | 86 (83.4)  | ESKA-Herrmann (55) / PRO (48)               | NR        | NR      | Fair            |
| Koscielny/2000/Germany        | 45  | NR           | NR         | PRO 2 (108) / PRO (69)                      | NR        | ^(3-63) | Fair            |
| SEBOVA/1997/Germany& Solvakia | 130 | ^^59.5       | 127 (97.6) | PRO (130)                                   | 121 (93)  | NR      | Fair            |
| Maddalena/1992/Germany        | 44  | 55.4         | 44 (100)   | ESKA-Herrmann (44)                          | NR        | 6       | Good            |
| Herrmann/1984/Germany         | 34  | NR           | NR         | BS (34)                                     | 13 (38.2) | NR      | Poor            |
| Mastronikolis/2008/Greece     | 12  | ^^64         | 12 (100)   | PRO 2 (12)                                  | 11 (91.6) | NR      | Good            |
| Krishnamurthy/2018/India      | 60  | 56           | 56 (93.3)  | PRO (60) / PRO 2 (60)                       | 48 (80)   | 36      | Good            |
| Shekaraiah/2018/India         | 10  | ^(45-75)     | 10 (100)   | BS (10)                                     | NR        | NR      | *(Unclear risk) |
| Chaturvedi/2014/India         | 58  | 56           | NR         | PRO (58)                                    | 51 (87.9) | NR      | Fair            |
| Suhail Sayed/2013/India       | 35  | 60 ^ (37-82) | 33 (94.2)  | PRO 2 (30) / PRO (5)                        | NR        | NR      | Fair            |
| Ramalingam/2007/India         | 41  | 48           | 39 (95)    | PRO (21) / BS (20)                          | 35 (85.4) | ^(6-18) | Fair            |
| Ramalingam/2006/India         | 41  | NR           | NR         | PRO (21) / BS (20)                          | NR        | NR      | Fair            |
| Agarwell/2006/India           | 25  | NR           | 24 (96)    | PRO (20) / PRO 2 (6) / BS (3)               | NR        | NR      | Fair            |
| K.nayak/2001/India            | 17  | NR           | NR         | PRO (17) / PRO 2 (17)                       | NR        | NR      | Fair            |
| GRILLO/2017/Italy             | 28  | 58.5         | 25 (89.2)  | PRO (28)                                    | 6 (21.4)  | 60      | Good            |
| COCUZZA/2016/Italy            | 54  | 67.19        | 49 (90.7)  | PRO Vega (54)                               | 13 (24)   | NR      | Good            |
| Giordano/2011/Italy           | 42  | 68.5 (4.8)   | 39 (92.8)  | PRO 2 (24)                                  | NR        | NR      | Fair            |
| Schuldt/2010/Italy            | 91  | NR           | NR         | ESKA-Herrmann (225) / PRO (20) / PRO 2 (83) | NR        | 127     | Poor            |
| Serra/2009/Italy              | 40  | ^^64         | 38 (95)    | PRO (36)                                    | NR        | NR      | Fair            |

|                               |     |             |            |                                                                |            |    |                 |
|-------------------------------|-----|-------------|------------|----------------------------------------------------------------|------------|----|-----------------|
| Schindler/2005/Italy          | 12  | 70          | 12 (100)   | BS (12)                                                        | NR         | NR | Fair            |
| Miani/1998/Italy              | 12  | 68          | 12 (100)   | Staffieri (6) / PRO (6)                                        | NR         | NR | Poor            |
| Kojima /2014/Japan            | 22  | ^(54-83)    | 19 (86.3)  | PRO 2 (22)                                                     | NR         | NR | Fair            |
| Terada /2012/Japan            | 40  | NR          | NR         | PRO 2 (40)                                                     | NR         | NR | Poor            |
| Attieh/2008/ Jordan           | 12  | 61.5        | 12 (100)   | BS (12)                                                        | NR         | NR | Fair            |
| Terada/2007/Japan             | 32  | 64.6        | 32 (100)   | PRO 2 (32)                                                     | 23 (71.8)  | NR | Fair            |
| Furuta/2005/Japan             | 8   | 33.5        | 6 (75)     | GRO (8)                                                        | NR         | NR | Poor            |
| Iwai/2003/Japan               | 20  | NR          | NR         | GRO (20)                                                       | 2 (10)     | NR | Fair            |
| Petersen/2019/Netherlands     | 232 | 64 (10.8)   | 185 (79.7) | PRO 2 (232) / PRO Vega (232)                                   | 220 (94.8) | NR | Good            |
| Atos Medical/2010/Netherlands | 20  | 66          | 18 (90)    | PRO XtraHME (20)                                               | 20 (100)   | NR | Fair            |
| Free/2014/Netherlands         | 138 | 68          | 123 (89.1) | LR-GRO (138) / PRO 2 (138)                                     | 64 (46.4)  | NR | Fair            |
| Hilgers/2013/Netherlands      | 47  | 64.7 (11.9) | 39 (82.9)  | PRO Vega (47)                                                  | 20 (42.5)  | NR | Fair            |
| Kalkeren/2013/Netherlands     | 14  | 66          | NR         | PRO Hands-free HME (7) / iValve prototype (7)                  | NR         | NR | *(Unclear risk) |
| Dirven/2012/Netherlands       | 24  | NR          | NR         | PRO Freehands HME (14) /<br>PRO Freehands HME + ENB (14)       | NR         | 1  | *(Low risk)     |
| Hilgers/2012/Netherlands      | 64  | 65.3        | 62 (95.3)  | PRO 2 (32) / PRO Vega (15) / PRO ActiValve<br>(15) /Others (2) | NR         | NR | Good            |
| Harms/2011/Netherlands        | 80  | NR          | NR         | GULR (80)<br>PRO 2 (80)                                        | NR         | 45 | *(Unclear risk) |

|                             |                  |                                |                               |                                                                                                          |                        |                   |                 |
|-----------------------------|------------------|--------------------------------|-------------------------------|----------------------------------------------------------------------------------------------------------|------------------------|-------------------|-----------------|
| Scheenstra/2011/Netherlands | D1: 10<br>D2: 13 | D1: 69.3 (7.2)<br>D2: 64 (9.8) | D1: 10 (100)<br>D2: 12 (92.3) | D1: PRO HME/Stomvent HME (10) / D2: R-<br>plus HME (13) / D1: R/L-plus HME (10) / D2:<br>L-plus HME (13) | D1: NR<br>D2: 10 (100) | D1: NR<br>D2: 1.5 | *(Unclear risk) |
| Dirven/2010/Netherlands     | 9                | 70                             | 9 (100)                       | PRO HME (3) / HME (9)                                                                                    | 8 (88.9)               | NR                | Fair            |
| Hilgers/2010/Netherlands    | 31               | 66.35                          | 30 (96.7)                     | PRO Vega (31)                                                                                            | 28 (90.3)              | 0.58              | Fair            |
| Zuur/2009/Netherlands       | 10               | 63.6 (8.7)                     | 9 (90)                        | PRO HME (6) / PRO without HME (4)                                                                        | NR                     | 6                 | *(Low risk)     |
| Soolsma/2008/Netherlands    | 42               | 65.1                           | 35 (83.3)                     | PRO ActiValve (42)                                                                                       | 38 (90.4)              | 7.6               | Fair            |
| Zuur/2008/Netherlands       | 10               | 64.4 (9.8)                     | NA                            | PRO HME (10) / PRO without HME (10)                                                                      | NR                     | 6                 | *(Low risk)     |
| Tack/2008/Netherlands       | 17               | 65.1                           | 0 (0)                         | GULR (17)                                                                                                | 17 (100)               | NR                | *(Unclear risk) |
| Buijssen/2007/Netherlands   | 34               | NR                             | NR                            | PRO 2 (26) / GULR (8)                                                                                    | NR                     | NR                | Poor            |
| Hilgers/2006/Netherlands    | 11               | 60.5                           | 10 (90.9)                     | PRO (11)                                                                                                 | 9 (81.8)               | NR                | Poor            |
| Jongmans/2006/Netherlands   | 11               | 66.9                           | 11 (100)                      | PRO (11)                                                                                                 | 10 (90.9)              | NR                | Good            |
| Schwandt/2006/Netherlands   | 45               | NR                             | NR                            | PRO 2 (45)                                                                                               | NR                     |                   | Poor            |
| Schwandt/2006/Netherlands   | 45               | NR                             | NR                            | PRO 2 (45)                                                                                               | NR                     | NR                | Fair            |
| Torn/2006/Netherlands       | 40               | 69                             | 11 (55)                       | GULR (20) / SPVP (20)                                                                                    | 8 (40)                 | NR                | *(Unclear risk) |
| COUL/2005/Netherlands       | 80               | 65                             | 71 (89.8)                     | PRO Free HME (80)                                                                                        | 75 (94.9)              | 6                 | Poor            |
| Eerenstein/2003/Netherlands | 69               | NR                             | NR                            | VoiceMaster (69)                                                                                         | NR                     | NR                | Fair            |
| Hilgers/2003/Netherlands    | 13               | 65                             | 12 (92.3)                     | PRO ActiValve (13)                                                                                       | 8 (61.5)               | NR                | Fair            |
| Hilgers/2003/Netherlands    | 20               | 62                             | 15 (75)                       | PRO Hands-free HME (15) / PRO HME (15) /<br>BS (12)                                                      | 19 (95)                | ^(5–14)           | *(Unclear risk) |
| Elving/2002/Netherlands     | 101              | 63                             | 87 (86.1)                     | GRO (101)                                                                                                | 101 (100)              | ^(1-106)          | Good            |

|                               |     |             |            |                                                                   |            |          |                 |
|-------------------------------|-----|-------------|------------|-------------------------------------------------------------------|------------|----------|-----------------|
| Torn/2001/Netherlands         | 6   | 63.8 (10.6) | 1 (16.7)   | LR-GRO (3) / SPVP (3)                                             | 3 (50)     | NR       | *(Unclear risk) |
| Coul/2000/Netherlands         | 318 | 61.9        | 261 (82)   | PRO (188) / PRO 2 (54) / GRO (76)                                 | 281 (88.3) | NR       | Fair            |
| Leunisse/2000/Netherlands     | 102 | 61.5        | 85 (83.3)  | GRO (102)                                                         | 96 (94.1)  | 26       | Good            |
| Ackerstaff/1999/Netherlands   | 239 | 65.3        | 204 (85.4) | PRO 2 (239)                                                       | 217 (90.8) | ^(1-16)  | Good            |
| Eerenstein/1999/Netherlands   | 183 | 64.6        | 24 (77.4)  | PRO (173) / Others (10)                                           | NR         | 40       | Fair            |
| Emmanuel/1999/Netherlands     | 18  | NR          | NR         | GULR with chemisorbed PA (9) /<br>GULR without chemisorbed PA (9) | NR         | 0.5 & 2  | *(Unclear risk) |
| Ackerstaff/1998/Netherlands   | 69  | 62          | 59 (85.5)  | PRO (68)                                                          | NR         | NR       | Fair            |
| Chung/1998/Netherlands        | 15  | 59.3 (13)   | 12 (80)    | LR-GRO (8) / PRO (7)                                              | NR         | 1 & 3    | *(Unclear risk) |
| Hoogen/1998/Netherlands       | 65  | NR          | NR         | PRO (31) / LR-GRO (21) / NYD (13)                                 | NR         | 1, 4, 10 | *(Unclear risk) |
| Van As/1998/Netherlands       | 41  | 62          | 41 (100)   | PRO (21) / Control (20)                                           | NR         | 48       | Fair            |
| Hilgers/1997/Netherlands      | 44  | 65          | 35 (79.5)  | PRO (44)                                                          | NR         | NR       | Poor            |
| Weissenbruch/1997/Netherlands | 55  | 61.5 (24.5) | 50 (90.9)  | PRO (55)                                                          | NR         | 6        | Fair            |
| Hilgers/1996/Netherlands      | 19  | 60          | 13 (68.4)  | PRO Stomafilter HME (19)                                          | NR         | 45.6     | Fair            |
| Hoogen/1996/ Netherlands      | 220 | NR          | NR         | GRO (220) / NYD (220) / PRO (220)                                 | NR         | NR       | Fair            |
| Hoogen/1996/Netherlands       | 30  | ^(40-73)    | 24 (80)    | BS (30) / GRO (14) / PRO (6) / NYD (10)                           | NR         | 6        | Poor            |
| Everaert /1996/Netherlands    | 7   | NR          | NR         | GRO (7) / GULR (7)                                                | NR         | 1        | Fair            |
| Hoogen/1996/Netherlands       | 158 | NR          | NR         | PRO (NR) / LR-GRO (NR) / NYD (NR)                                 | NR         | 30       | *(Unclear risk) |
| Grolman/1995/Netherlands      | 18  | 56.5        | NR         | BS (18)                                                           | NR         | NR       | Fair            |
| Ackerstaff/1993/Netherlands   | 61  | 66 (0.5)    | 54 (88.5)  | PRO HME (37) / Control (24)                                       | NR         | 0 & 3    | *(Unclear risk) |
| HILGERS/1993/Netherlands      | 132 | 2           | 106 (80.3) | PRO (132)                                                         | 111 (84)   | NR       | Fair            |

|                             |     |              |            |                                            |           |             |                 |
|-----------------------------|-----|--------------|------------|--------------------------------------------|-----------|-------------|-----------------|
| Bijl/1992/Netherlands       | 32  | ^^64         | 32 (100)   | GRO (32)                                   | NR        | NR          | *(Low risk)     |
| Lith-Bijl/1992/Netherlands  | 32  | 64           | 32 (100)   | LR-GRO (16) / SGB (16)                     | NR        | 6           | *(Unclear risk) |
| Hjroosingh/1991/Netherlands | 86  | 60.5         | 79 (91.8)  | GRO (86)                                   | 86 (100)  | ^(6-60)     | Fair            |
| Manni/1990/Netherlands      | 132 | 61           | 121 (91.6) | GRO (132)                                  | 34 (25.7) | NR          | Fair            |
| Mahieu/1986/Netherlands     | 10  | NR           | NR         | GRO (10)                                   | 10 (100)  | NR          | Poor            |
| Mahieu/1986/Netherlands     | 10  | NR           | NR         | GRO (10)                                   | 10 (100)  | NR          | Poor            |
| Manni/1985/Netherlands      | 34  | NR           | NR         | GRO (34)                                   | NR        | NR          | Fair            |
| Manni/1984/Netherlands      | 22  | 61           | NR         | Customized VPs (22)                        | NR        | NR          | Fair            |
| Hall/2009/Norway            | 40  | NR           | 40 (100)   | BS (40)                                    | NR        | NR          | Poor            |
| Awan/2005/Pakistan          | 35  | 35           | 35 (100)   | BS (35)                                    | NR        | 11 ^ (2-18) | Fair            |
| Nowicka/2012/Poland         | 42  | 62.1         | 36 (85.7)  | PRO 2 (42)                                 | NR        | 30          | Fair            |
| Wierzchowska M/2011/Poland  | 76  | 56.6         | 69 (90.7)  | PRO 2 (76)                                 | NR        | NR          | Poor            |
| Bien/2010/Poland            | 80  | 62 (7)       | 68 (85)    | PRO HME (40) / PRO without HME (40)        | 60 (75)   | 1 & 3       | *(Unclear risk) |
| Okła/2006/Poland            | 106 | 60.4         | 91 (85.8)  | PRO 2 (106)                                | 85 (80.1) | 20.5        | Fair            |
| Vlantis/2003/South Africa   | 17  | 62.6         | 15 (88.2)  | PRO 2 (17)                                 | NR        | NR          | Fair            |
| Mayo-Yáñez/2018/Spain       | 34  | 61.18 (8.29) | NR         | PRO 2 (34) / PRO Vega (34)                 | NR        | NR          | Fair            |
| Herranz/2013/Spain          | 45  | 60.2 (9.4)   | 42 (93.3)  | PRO HME (41) / PRO XtraHME (40)            | NR        | 3           | *(Unclear risk) |
| Sarrias/2013/Spain          | 115 | NR           | 107 (93)   | PRO HME (115)                              | NR        | 17          | Fair            |
| Poggioli/2007/Spain         | 96  | 59           | 89 (92.7)  | PRO (81) / BS (7) / Herrmann (7) / GRO (1) | 7 (7.2)   | NR          | Fair            |
| Ramírez /2001/Spain         | 350 | 57.5         | 350 (100)  | Herrmann (350)                             | 2 (0.57)  | NR          | Fair            |
| Sandberg/1992/Sweden        | 35  | NR           | NR         | BS (13) / PRO (5)                          | NR        | NR          | Poor            |



|                       |     |               |            |                                                                                                                               |           |                |      |
|-----------------------|-----|---------------|------------|-------------------------------------------------------------------------------------------------------------------------------|-----------|----------------|------|
| Hotz/2002/Switzerland | 87  | 62            | 82 (94.2)  | PRO (87) / PRO 2 (87)                                                                                                         | 66 (75.9) | NR             | Fair |
| Sirin/2015/Turkey     | 34  | 58.55         | 32 (94.1)  | PRO (34)                                                                                                                      | 11 (32.3) | NR             | Fair |
| Yenigun/2015/Turkey   | 27  | 63 (8.9)      | NR         | PRO (27)                                                                                                                      | NR        | 60.3           | Good |
| Sword/2014/Turkey     | 210 | 58 (11.9)     | 180 (85.7) | PRO 2 (210)                                                                                                                   | NR        | NR             | Good |
| Polat/2014/Turkey     | 34  | 59.6 (6.3)    | 34 (100)   | PRO (34)                                                                                                                      | 20 (58.8) | NR             | Good |
| Topalo/2010/Turkey    | 61  | NR            | 61 (100)   | PRO (33) / VoiceMaster (18) / BS (10)                                                                                         | 16 (23.8) | NR             | Fair |
| Akbay/2003/Turkey     | 187 | 63.7          | 184 (98.3) | BS (187)                                                                                                                      | NR        | 62             | Fair |
| Coffey/2018/UK        | 41  | NR            | 35 (85.3)  | PRO NID (41) / PRO Vega (41) / BS Duckbill<br>(41) / BS Low Pressure (41) / BS Classic<br>Indwelling (41) / BS Advantage (41) | 37 (90.2) | NR             | Good |
| KERR/2013/UK          | 51  | 64 ^{(38-74)} | 44 (86.2)  | BS (51)                                                                                                                       | NR        | 132            | Fair |
| Kazi/2007/UK          | 51  | 65 ^{(40-85)} | 37 (72.5)  | BS (46) / PRO (5)                                                                                                             | 44 (86.3) | NR             | Fair |
| Kazi/2007/UK          | 78  | 40.9 (13.5)   | 54 (69.2)  | BS (47) / Normal (31)                                                                                                         | 25 (53.1) | NR             | Good |
| HAMADE /2006/UK       | 4   | ^{(27-73)}    | 4 (100)    | PRO Freehands HME (4)                                                                                                         | 3 (75)    | NR             | Fair |
| Rokade/2003/UK        | 2   | 72            | 1 (100)    | PRO 2 (2)                                                                                                                     | 1 (50)    | 11, 8          | Good |
| CARPENTIER/1996/UK    | 42  | 58.6          | NR         | PRO (42)                                                                                                                      | 18 (42)   | NR             | Fair |
| CALLANAN/1995/UK      | 28  | 63.2 (8.3)    | 24 (85.7)  | PRO (24)                                                                                                                      | NR        | ^{(0.16-25.7)} | Fair |
| Panarese/1994/UK      | 9   | 63            | 5 (55.56)  | PRO (9)                                                                                                                       | 6 (66.67) | ^{(3-23)}      | Good |
| Prichard/1994/UK      | 65  | 61            | 49 (75)    | PRO (9)                                                                                                                       | 61 (93.8) | 26.35          | Good |
| Palmer/1993/UK        | 16  | NR            | NR         | BS (65)                                                                                                                       | NR        | NR             | Fair |

|                      |     |                |            |                                        |           |                |                 |
|----------------------|-----|----------------|------------|----------------------------------------|-----------|----------------|-----------------|
| Parker/1992/UK       | 22  | 60             | 22 (100)   | BS (16)                                | NR        | 22 ^{(2-41)}   | Fair            |
| Perry/1988/UK        | 166 | 64             | 134 (80.7) | GRO (22)                               | NR        | NR             | Fair            |
| Brownlee/2018/USA    | 14  | 64             | 10 (71.4)  | BS (14)                                | NR        | NR             | Good            |
| Starmer/2017/USA     | 6   | 65 ^{(56-76)}  | NR         | TEVPI (6)                              | NR        | NR             | Fair            |
| Gavriel D./2016/USA  | 5   | 30.2           | 4 (80)     | PRO 2 (3) / BS (2) / PRO Vega (1)      | NR        | NR             | Fair            |
| Thylur/2016/USA      | 21  | 64             | 17 (80.9)  | PRO 2 (21) / PRO Vega (21)             | 17 (80.9) | NR             | Good            |
| Damrose/2014/USA     | 34  | 65.9           | 27 (79.4)  | BSTPS (34)                             | 29 (85.2) | NR             | Fair            |
| Lewin/2014/USA       | 186 | 59 ^{(33-86)}  | 152 (81.7) | HTEPP (34)                             | 162 (87)  | 72             | Good            |
| Lewin/2012/USA       | 21  | 60 ^{(51-87)}  | 18 (85.7)  | Customized VP (21)                     | 19 (90.4) | NR             | Fair            |
| Graville/2011/USA    | 11  | 64.3           | 10 (90.9)  | PRO ActiValve (11)                     | 11 (100)  | 30.45          | Fair            |
| Moreno/2010/USA      | 21  | 66 ^{(49-84)}  | 16 (76.1)  | PRO HME (21)                           | 15 (71.4) | ^{(10-56)}     | Good            |
| Deschler/2009/USA    | 30  | NR             | 26 (86.6)  | BS (30)                                | 29 (96.6) | NR             | Good            |
| Gerwin/2005/USA      | 16  | ^{58.2}        | 14 (87.5)  | BS (16)                                | NR        | NR             | Fair            |
| Leder/2005/USA       | 42  | ^{(36.8-86.6)} | 29 (69)    | BS indwelling (42) / BS Advantage (42) | NR        | NR             | Fair            |
| Ackerstaff/2003/ USA | 64  | 66             | 62 (76.5)  | BS (42)                                | 63 (98.4) | 3.5            | Fair            |
| Deschler/1999/USA    | 11  | NR             | 10 (90.9)  | BS (11)                                | 11 (100)  | NR             | Fair            |
| Graville/1999/USA    | 30  | NR             | NR         | BS (11)                                | NR        | NR             | Fair            |
| Leder/1997/USA       | 81  | ^{(44-92)}     | 65 (80.2)  | BS (81)                                | 81 (100)  | NR             | Fair            |
| Michelle/1997/USA    | 21  | 59.5           | 17 (80.9)  | PRO (21)                               | 11 (52.3) | 10.8 ^{(2-17)} | Fair            |
| Blom/1995/USA        | 29  | 59.9 (11.2)    | 19 (65.5)  | PRO (21)                               | NR        | 0.75, 6, 12    | *(Unclear risk) |

|                      |     |                  |           |                                                                            |           |         |                 |
|----------------------|-----|------------------|-----------|----------------------------------------------------------------------------|-----------|---------|-----------------|
| Doherty/1994/USA     | 11  | 61.5 ^ (51.5-73) | 10 (90.9) | BS after neurectomy + myotomy (10) / BS+ neurectomy (9) / BS+ myotomy (10) | 11 (100)  | NR      | Fair            |
| Trudeau/1991/USA     | 108 | NR               | NR        | BS                                                                         | 35 (32.4) | NR      | Fair            |
| Mickel/1987/USA      | 104 | NR               | NR        | BS (104)                                                                   | 83 (79.8) | NR      | Fair            |
| Pretsfelder/1985/USA | 12  | ^(40-76)         | NR        | BS (12)                                                                    | NR        | NR      | Poor            |
| Wetmore/1985/USA     | 66  | NR               | NR        | BS (12)                                                                    | NR        | NR      | Fair            |
| Stuart/1983/USA      | 14  | NR               | NR        | BS (66)                                                                    | NR        | NR      | *(Unclear risk) |
| MAVES/1982/USA       | 11  | NR               | 9 (81.8)  | BS (8)<br>Panje (6)                                                        | 6 (54.5)  | NR      | Fair            |
| GLUCKMAN/1981/USA    | 23  | ^(51-77)         | 17 (73.9) | Panje (6)<br>BS (4)                                                        | 11 (50)   | NR      | Fair            |
| PANJE/1981/USA       | 24  | ^(42-67)         | 21 (87.5) | BS (23)                                                                    | 20 (83.3) | NR      | Fair            |
| WETMORE /1981/USA    | 18  | NR               | 17 (94.4) | BS (18)                                                                    | 12 (66.6) | ^(2-11) | Fair            |
| Wetmore/1981/USA     | 63  | NR               | NR        | BS (63)                                                                    | NR        | ^(1-12) | Fair            |
| Rood/1981/USA        | 30  | ^(44-77)         | 19 (63.3) | BS (63)                                                                    | NR        | NR      | Fair            |
| Johns/1981/USA       | 26  | NR               | NR        | BS (30)                                                                    | NR        | NR      | Poor            |

**Abbreviations:** PRO, Provox; GRO, Groningen; LR-GRO, Groningen low resistance; GULR, Groningen Ultra Low Resistance; NYD, Nijdam; BS, Blom-Singer; VP, voice prostheses; HME, heat moisture exchanger; ENB, external neck brace; SPVP, sound producing voice prosthesis; SGB, standard Groningen Button; TEVPI, Tracheoesophageal voice prosthesis insufflator; PA, perfluoro-alkylsiloxane; BSTPS, Blom-Singer Tracheoesophageal Puncture Set; SD, Standard deviation; NR, Not reported; D, dataset, ^ range, ^^ median; \* = randomized controlled trials, its quality assessment by ROB Cochrane tool.
