# Supplementary material
Source: publisher figshare collection journal article supplement (https://asha.figshare.com/articles/dataset/_/14802903)
Supplement: Supplementary file 35 [file 1]

**Supplemental Figure S16.** Network meta-analysis for Loosening of adhesive of each device.

**A**

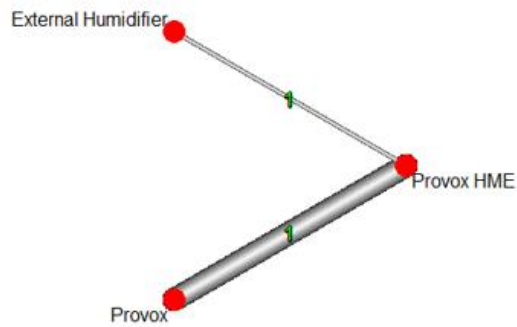

**C**

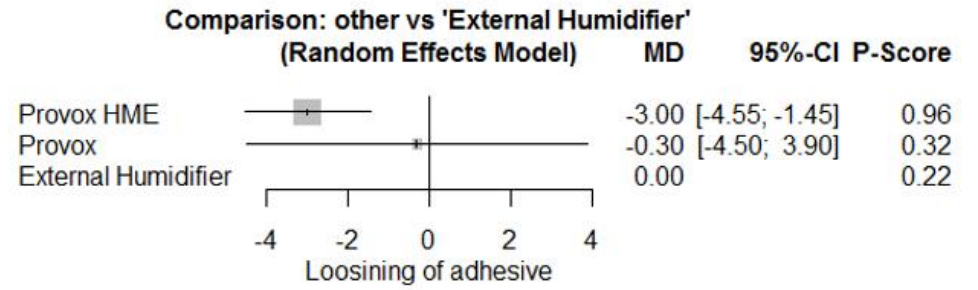

**B**

|                             |                             |                            |
|-----------------------------|-----------------------------|----------------------------|
| <b>Provox HME</b>           |                             |                            |
| <b>-0.30 [-0.51; -0.09]</b> | <b>Provox</b>               |                            |
| <b>-1.49 [-2.40; -0.57]</b> | <b>-1.19 [-2.13; -0.25]</b> | <b>External Humidifier</b> |
