# Supplementary material
Source: publisher figshare collection journal article supplement (https://asha.figshare.com/articles/dataset/_/14802903)

**Supplemental Figure S5.** Network meta-analysis for Air flow resistance of each device.

**A**

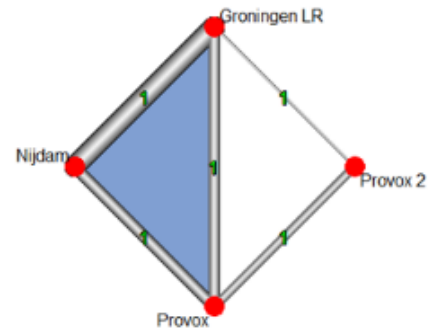

**B**

|                          |                          |                          |               |
|--------------------------|--------------------------|--------------------------|---------------|
| <b>Provox 2</b>          |                          |                          |               |
| <b>0.50 [0.11; 2.34]</b> | <b>Provox</b>            |                          |               |
| <b>0.42 [0.08; 2.11]</b> | <b>0.84 [0.18; 3.95]</b> | <b>Groningen LR</b>      |               |
| <b>0.32 [0.04; 2.66]</b> | <b>0.65 [0.11; 3.84]</b> | <b>0.77 [0.13; 4.49]</b> | <b>Nijdam</b> |

**C**

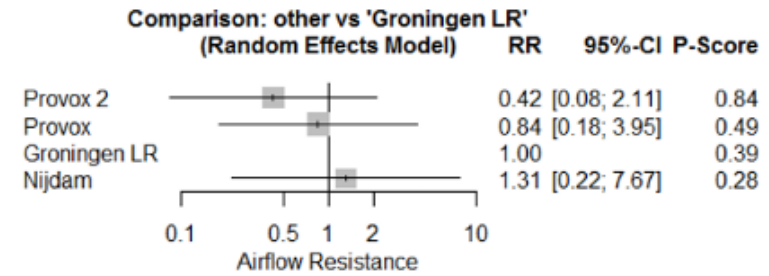

Supplement: Supplementary file 36 [file 1]
