# Supplementary material
Source: publisher figshare collection journal article supplement (https://asha.figshare.com/articles/dataset/_/14802903)

**Supplemental Figure S17.** Network meta-analysis for Increase phonatory effort of each device.

**A**

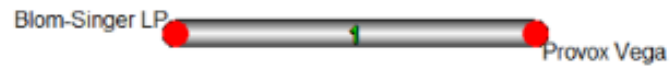

**C**

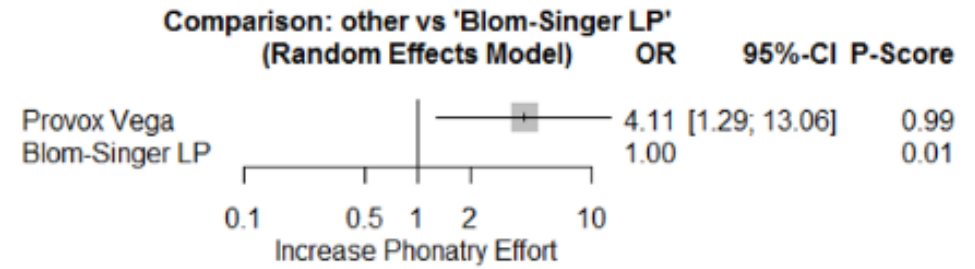

**B**

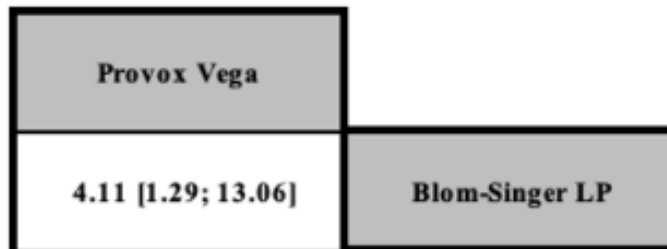

Supplement: Supplementary file 2 [file 1]

**Supplemental Figure S10.** Network meta-analysis for Stoma cleaning of each device.

**A**

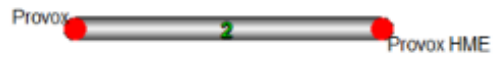

**C**

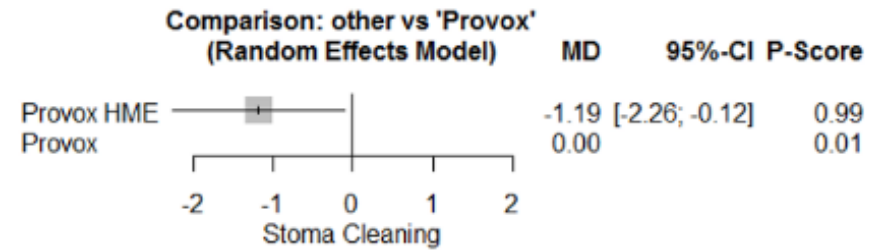

**B**

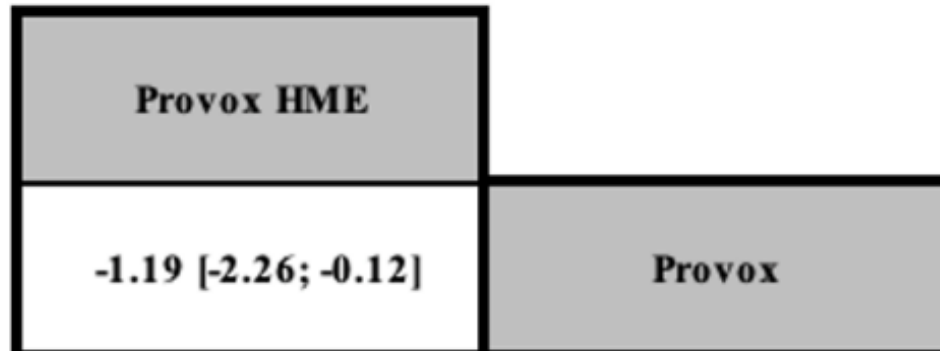

Supplement: Supplementary file 3 [file 1]

**Supplemental Figure S4.** Network meta-analysis for Duration lifetime of each device.

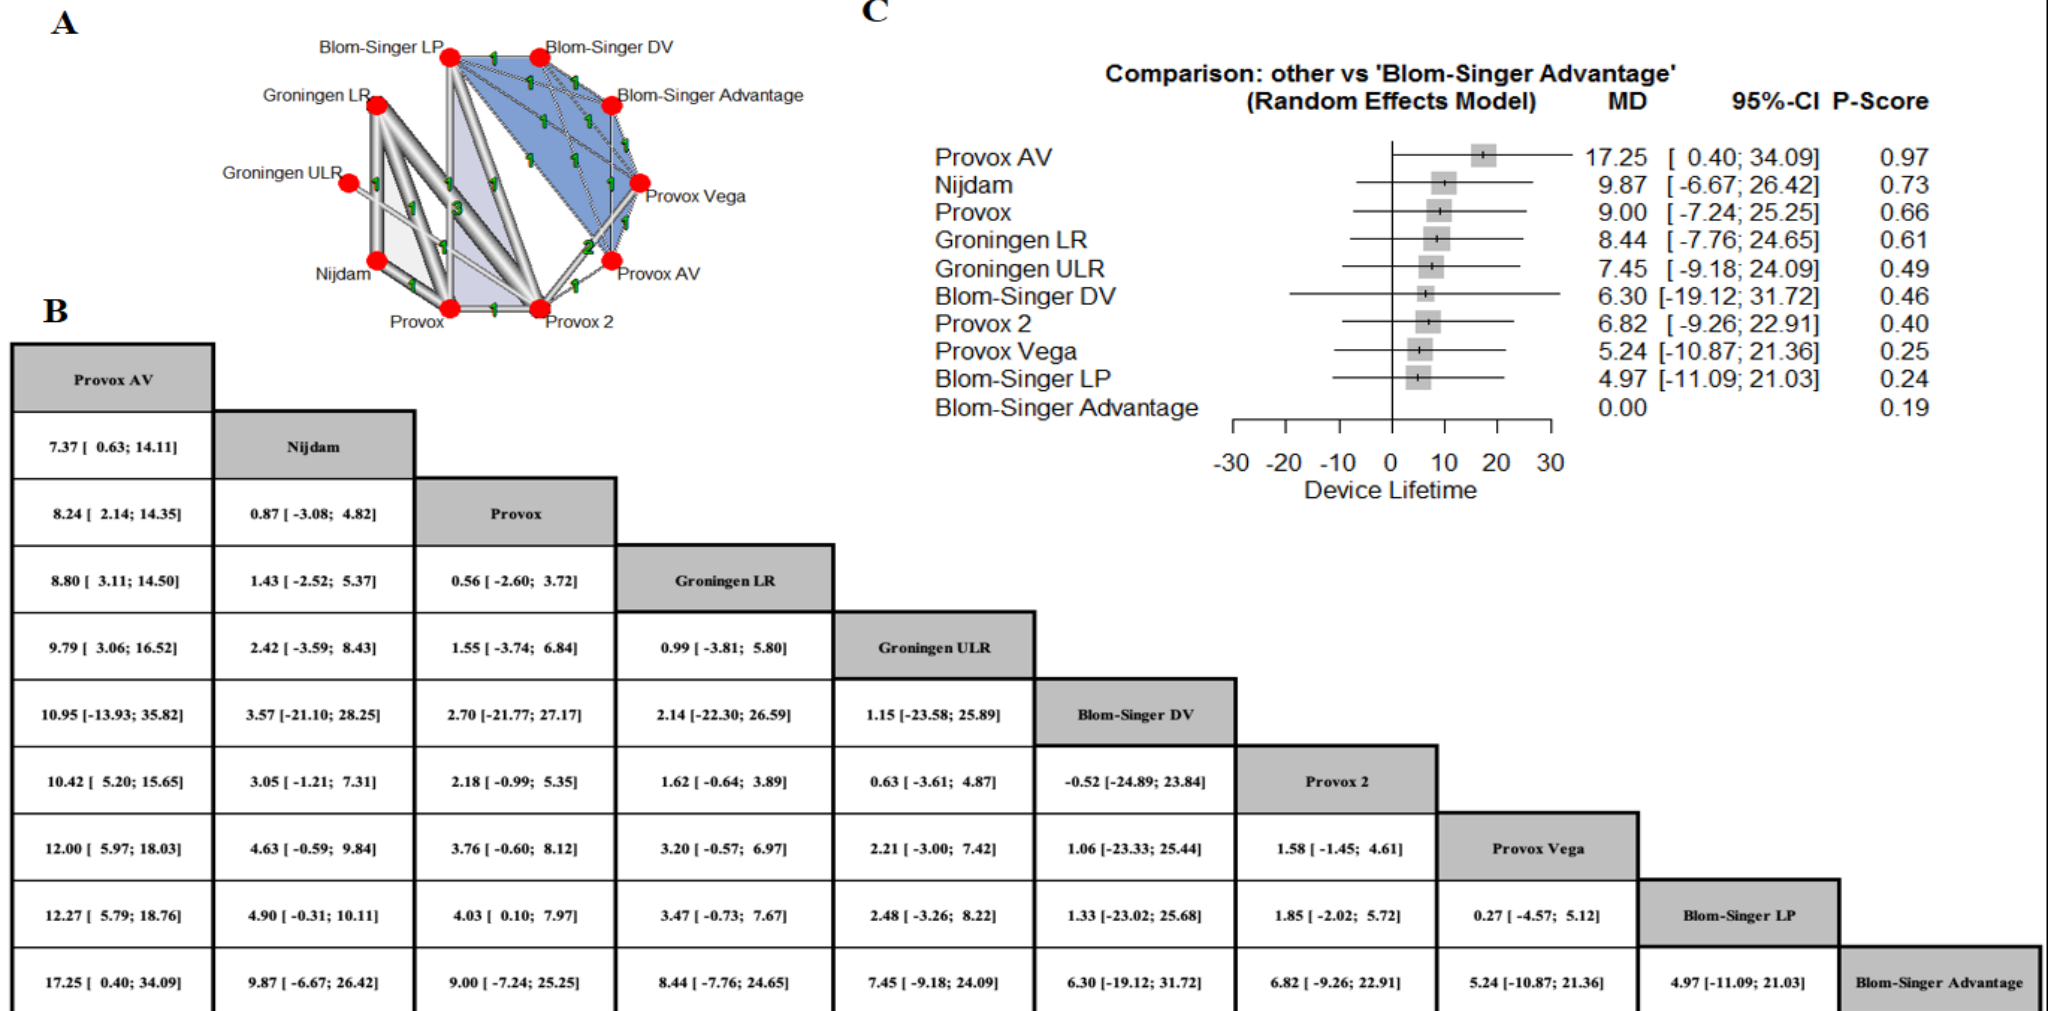

Supplement: Supplementary file 5 [file 1]

**Supplemental Figure S8.** Network meta-analysis for Speech rate of each device.

**A**

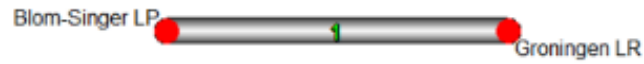

**C**

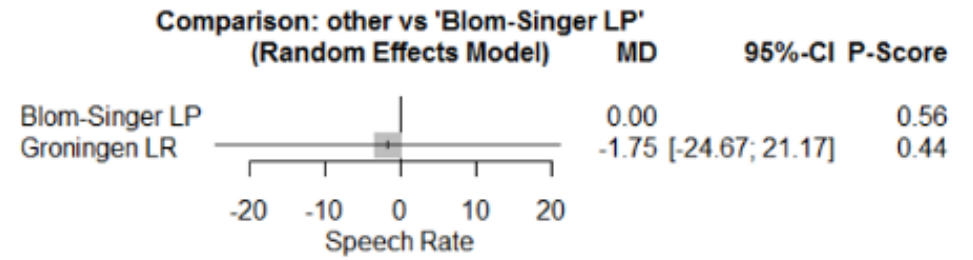

**B**

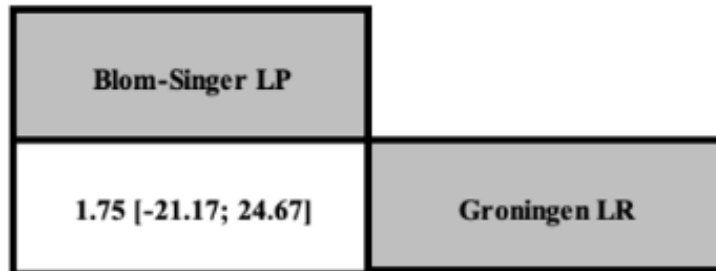

Supplement: Supplementary file 7 [file 1]

**Supplemental Figure S26.** Network meta-analysis for Breathing Experience of each device.

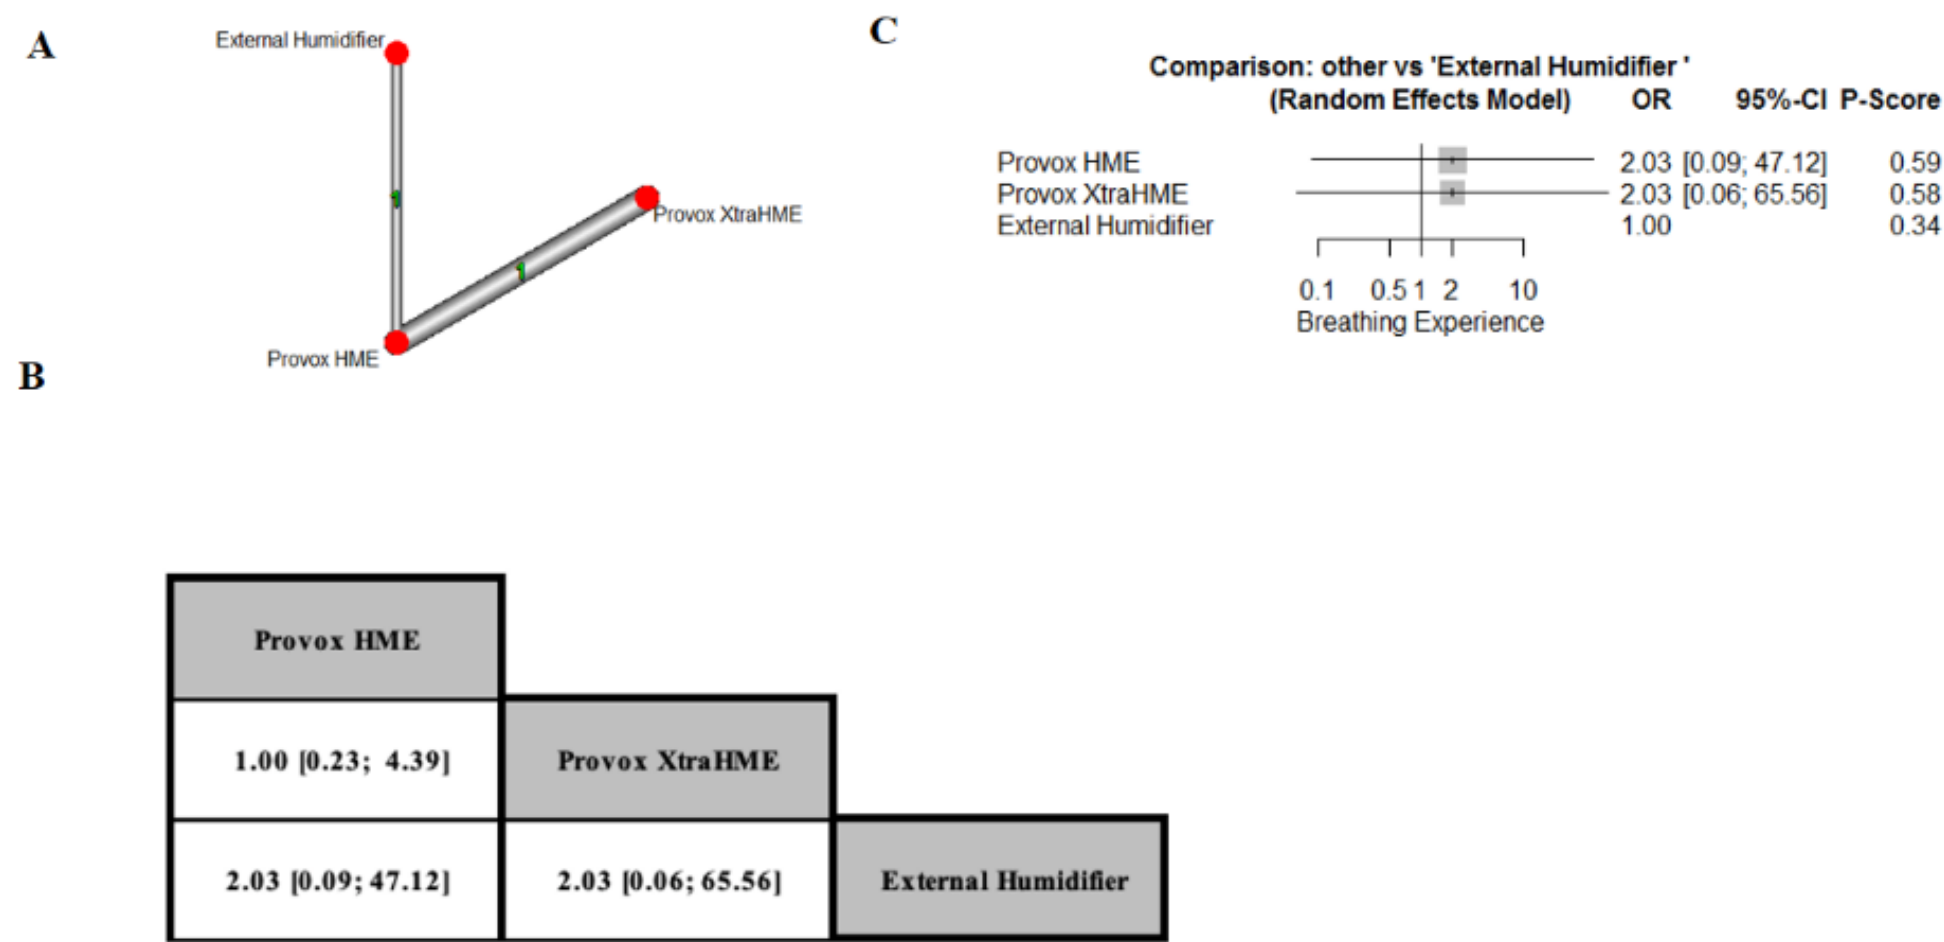

Supplement: Supplementary file 10 [file 1]

**Supplemental Figure S21.** Network meta-analysis for Speech Intelligibility of each device.

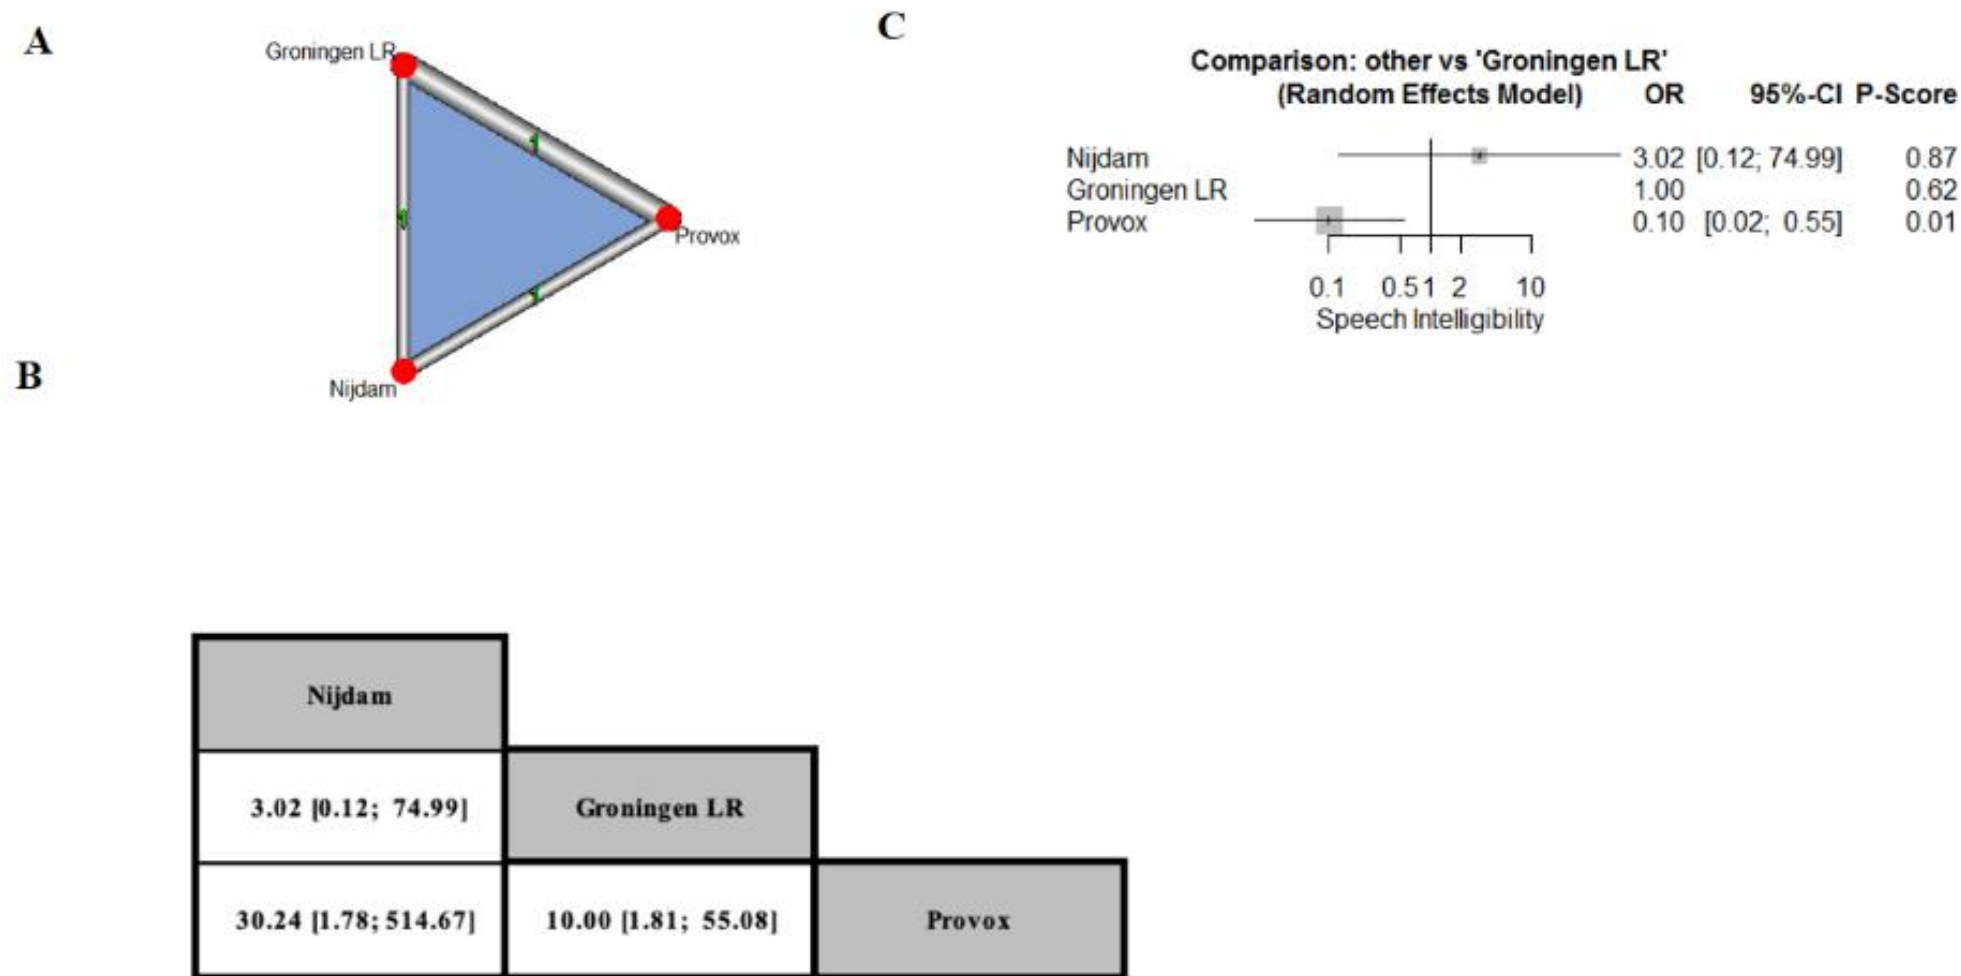

Supplement: Supplementary file 14 [file 1]

**Supplemental Figure S24.** Network meta-analysis for Fistula problems of each device.

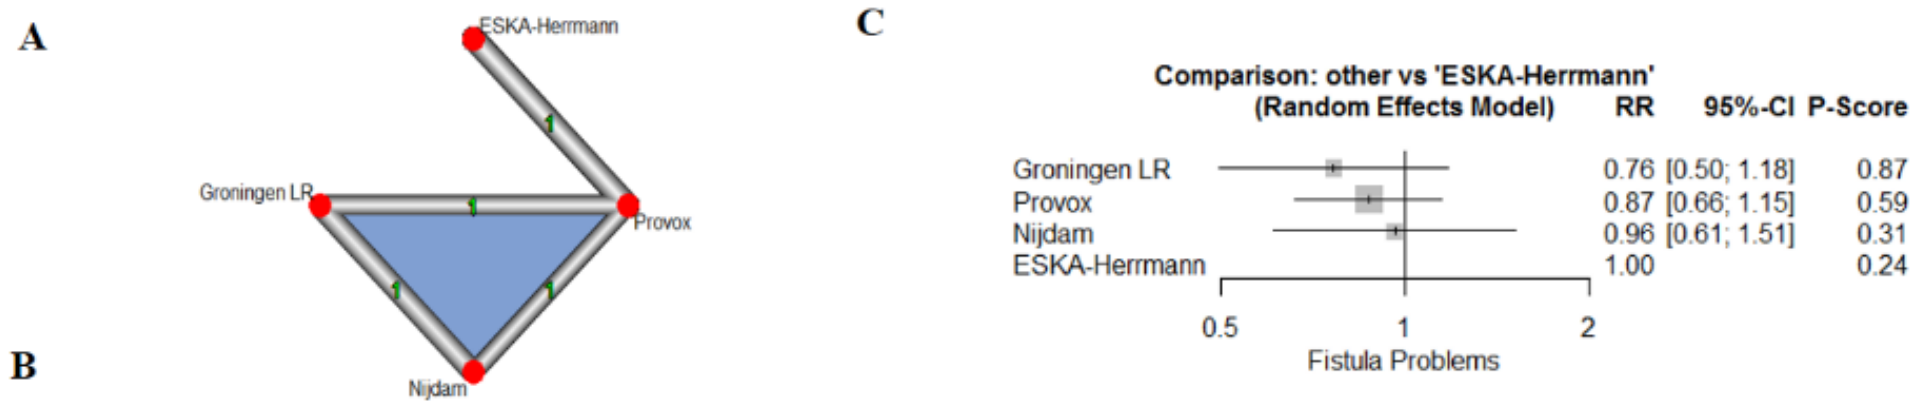

Supplement: Supplementary file 18 [file 1]

**Supplemental Figure S3.** Network meta-analysis for Replacements frequency of each device.

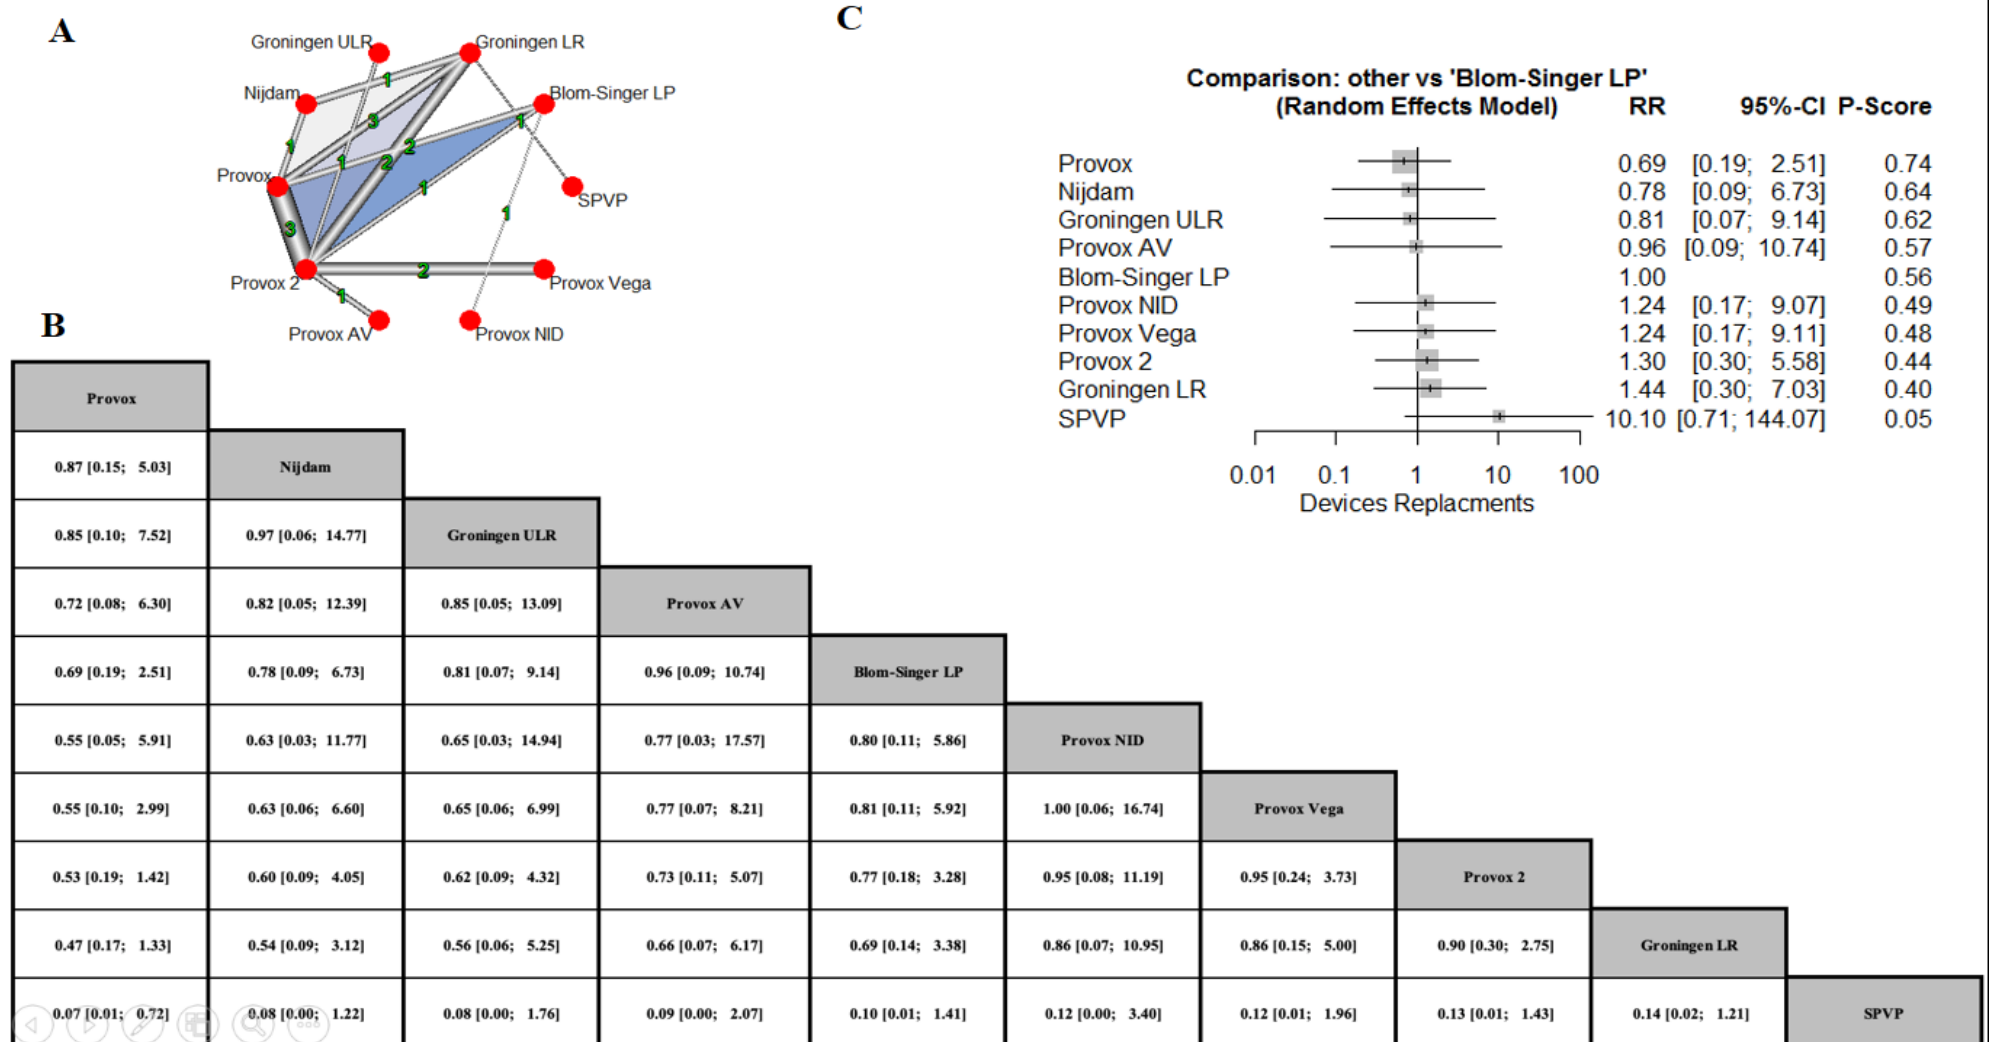

Supplement: Supplementary file 20 [file 1]

**Supplemental Figure S22.** Network meta-analysis for Stoma stenosis of each device.

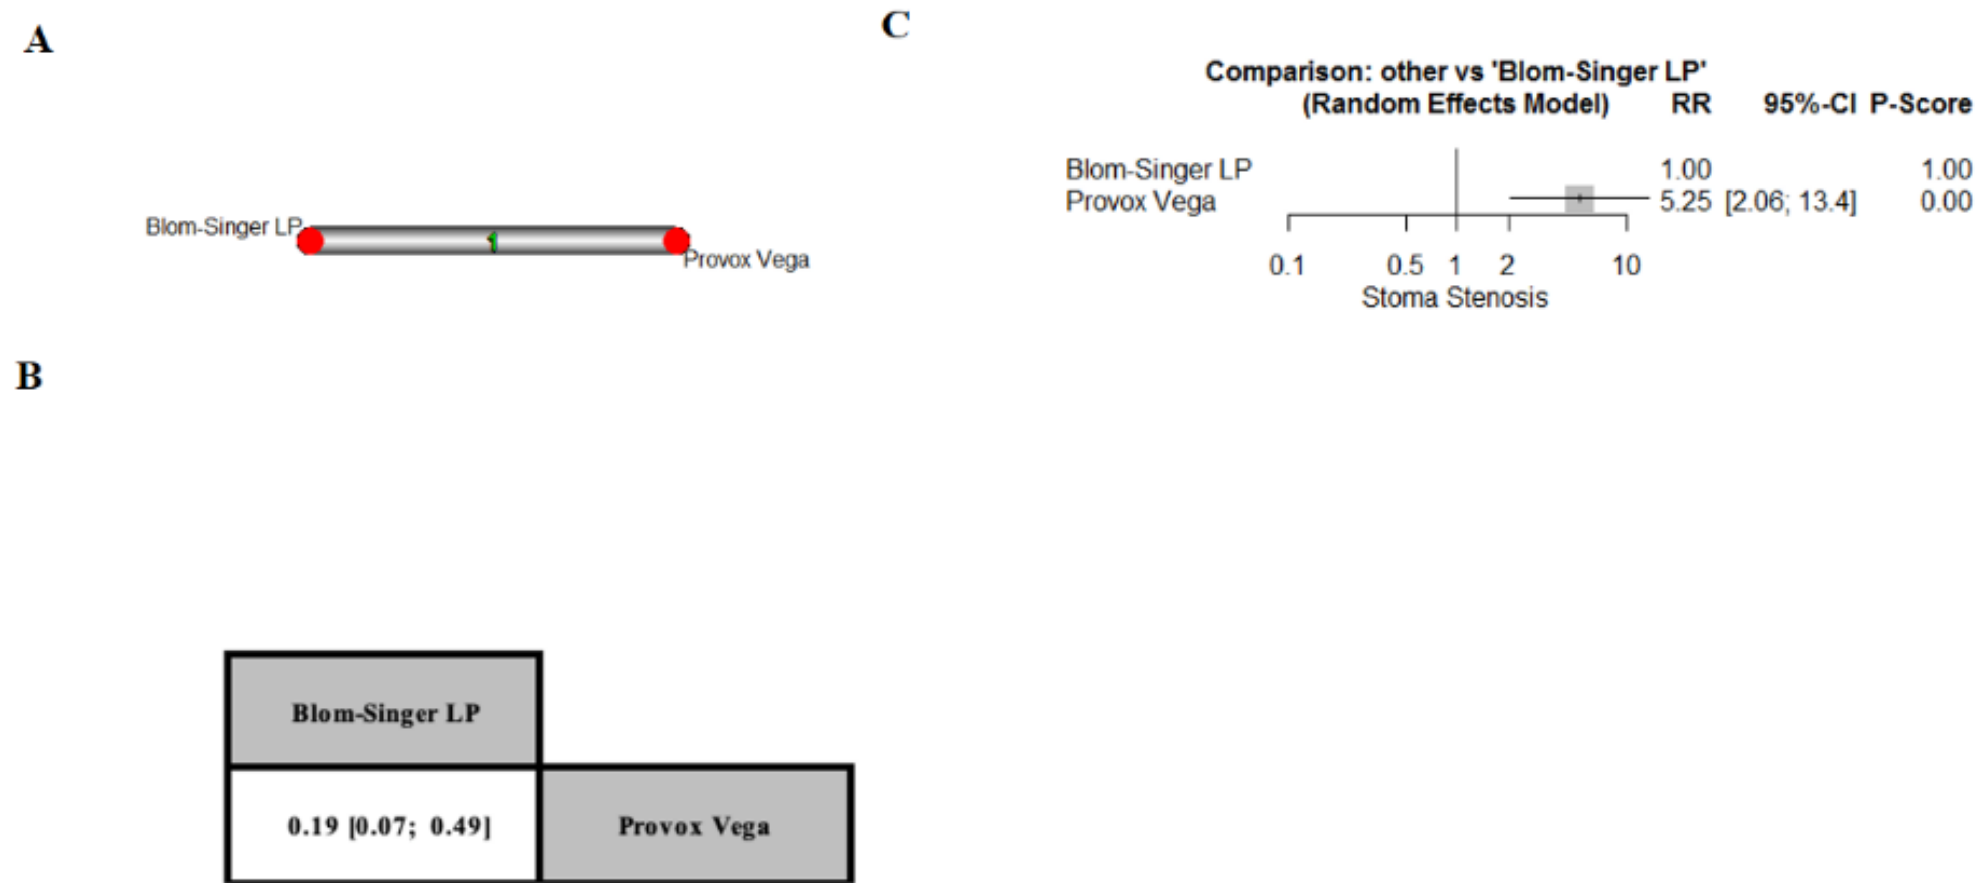

Supplement: Supplementary file 21 [file 1]

**Supplemental Figure S29.** Network meta-analysis for Follow-up survival rate of each device.

**A**

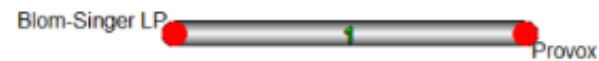

**C**

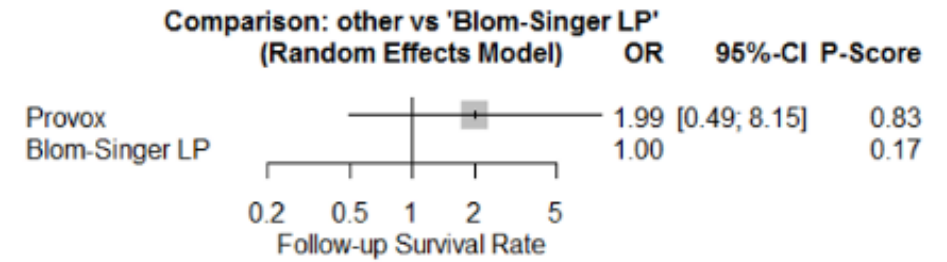

**B**

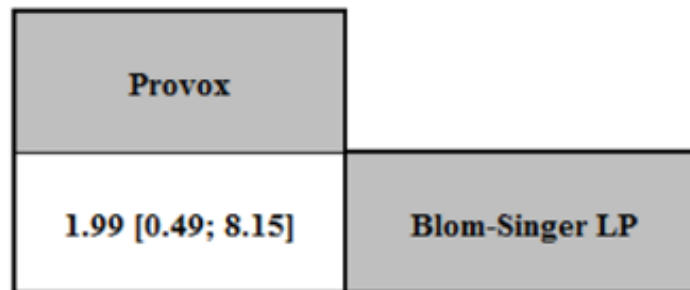

Supplement: Supplementary file 27 [file 1]

**Supplemental Figure S28.** Network meta-analysis for Prosthesis deterioration of each device.

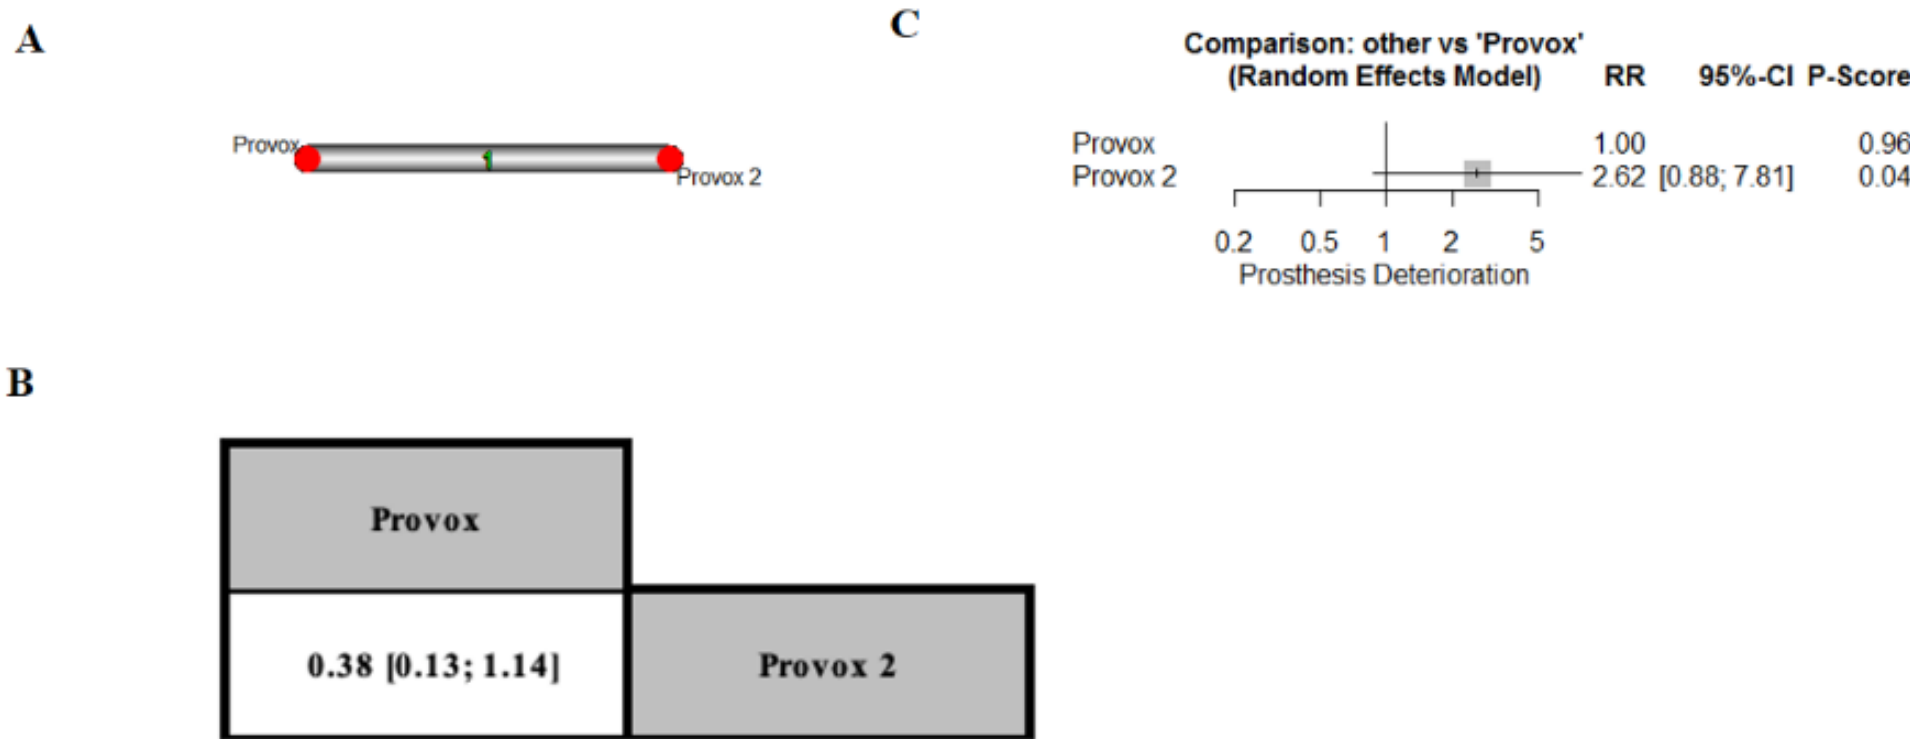

Supplement: Supplementary file 30 [file 1]

**Supplemental Figure S23.** Network meta-analysis for Dislodgement of each device.

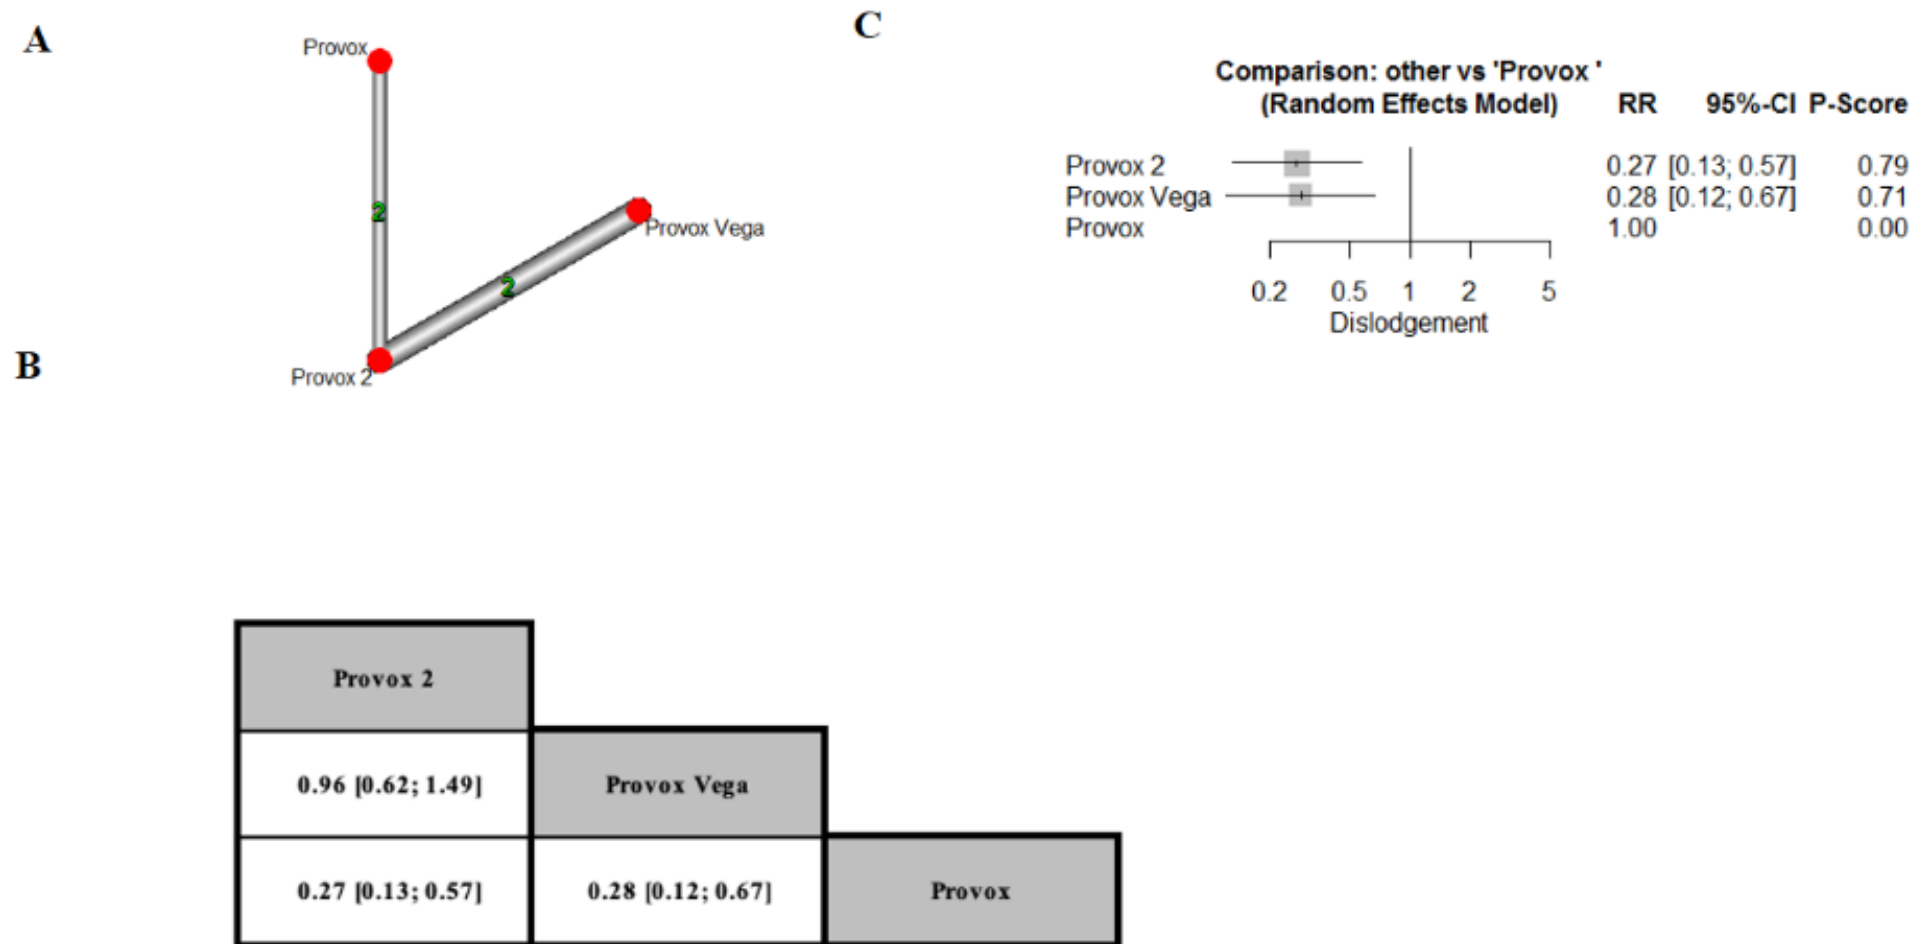

Supplement: Supplementary file 31 [file 1]

**Supplemental Figure S25.** Network meta-analysis for Granulation of each device.

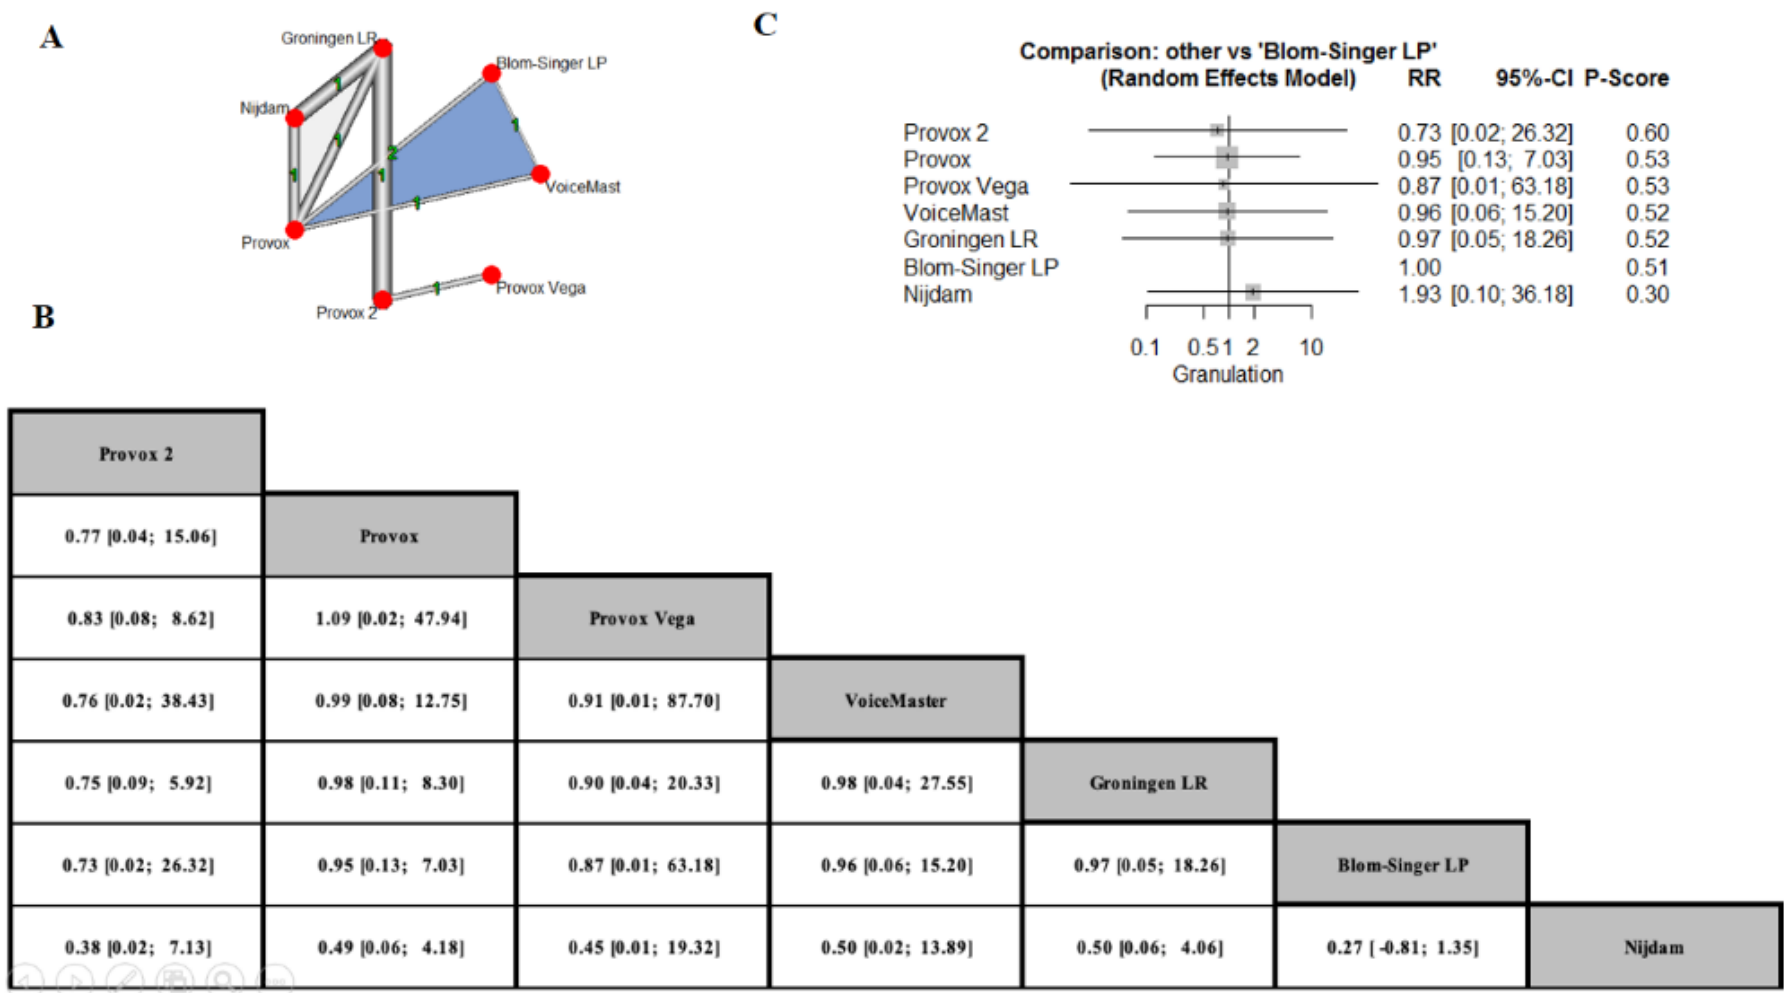

Supplement: Supplementary file 34 [file 1]
